# Supplementary material for: Seed Diversity in the Tribe Miconieae (Melastomataceae): Taxonomic, Systematic, and Evolutionary Implications
Source: PubMed Central journal article supplement (PMC4067357; doi:10.1371/journal.pone.0100561), 2014-06-23
Supplement: pone.0100561.s003.pdf [file pone.0100561.s003.pdf]

Table S1. Species name, source from which seed information was obtained (voucher information of plant material or literature reference), and GenBank accession numbers (ETS, ITS, *accD-psal*, and *psbK-psbI*). Taxa are arranged in alphabetical order by genus and species. Outgroup taxa are shown at the end of the table. NA = not available; \* = SEM image taken at CAS; ‡ = SEM image taken at NY.

| Species                                                    | Source                                        | ETS      | ITS      | <i>accD-psal</i> | <i>psbK-psbI</i> |
|------------------------------------------------------------|-----------------------------------------------|----------|----------|------------------|------------------|
| <i>Anaectocalyx bracteosa</i> (Naudin) Triana ex Cogn.     | Ocampo and Almeda [31]                        | KF820582 | AY460460 | KF819864         | KF821784         |
| <i>Calycogonium bissei</i> Bécquer                         | Cuba, <i>HFC 11650</i> (HAJB)‡                | KF820591 | KF821408 | KF819873         | KF821793         |
| <i>Calycogonium glabratum</i> (Sw.) DC.                    | Ocampo and Almeda [31]                        | KF820594 | EU055645 | KF819875         | KF821795         |
| <i>Calycogonium grisebachii</i> Triana                     | Bécquer et al. [57]                           | KF820596 | KF821409 | KF819877         | KF821797         |
| <i>Calycogonium heterophyllum</i> Naudin                   | Cuba, <i>HFC 81151</i> (HAJB)‡                | KF820597 | EU055647 | KF819878         | KF821798         |
| <i>Calycogonium lanceolatum</i> Griseb.                    | Cuba, <i>HFC 84642</i> (HAJB)‡                | KF820599 | KF821410 | KF819880         | KF821800         |
| <i>Calycogonium microphyllum</i> C. Wright                 | Cuba, <i>Ekman 12729</i> (NY)‡                | KF820600 | KF821411 | KF819881         | KF821801         |
| <i>Calycogonium revolutum</i> Alain                        | Cuba, <i>HFC 82510</i> (HAJB)‡                | KF820603 | EU055650 | KF819884         | KF821804         |
| <i>Calycogonium rosmarinifolium</i> Griseb.                | Cuba, <i>León 19329</i> (NY)‡                 | KF820606 | EU055651 | NA               | KF821807         |
| <i>Charianthus alpinus</i> (Sw.) R.A.Howard                | Ocampo and Almeda [31]                        | KF820610 | AY460463 | KF819891         | KF821813         |
| <i>Charianthus corymbosus</i> (Rich.) Cogn.                | Dominica, <i>Cooper 31</i> (NY)‡              | KF820611 | AY460464 | NA               | KF821814         |
| <i>Charianthus dominicensis</i> Penneys & Judd             | Ocampo and Almeda [31]                        | KF820612 | AY460465 | KF819892         | KF821815         |
| <i>Charianthus nodosus</i> (Desr.) Triana                  | Ocampo and Almeda [31]                        | KF820613 | AY460466 | KF819893         | KF821816         |
| <i>Charianthus purpureus</i> D. Don                        | Ocampo and Almeda [31]                        | NA       | AY460467 | NA               | NA               |
| <i>Clidemia allardii</i> Wurdack                           | Ecuador, <i>Øllgaard 35365</i> (NY)‡          | KF820615 | AY460468 | KF819895         | KF821818         |
| <i>Clidemia alternifolia</i> Wurdack                       | Venezuela, <i>Maas 6855</i> (NY)‡             | KF820617 | AY460469 | NA               | KF821820         |
| <i>Clidemia angustilamina</i> Judd & Skean                 | Dominican Republic, <i>Judd 6662</i> (NY)‡    | KF820619 | EF418923 | KF819898         | KF821822         |
| <i>Clidemia aphanantha</i> (Naudin) Sagot                  | Venezuela, <i>Liesner 25940</i> (NY)‡         | KF820621 | EF418797 | KF819900         | KF821824         |
| <i>Clidemia capilliflora</i> (Naudin) Cogn.                | Brazil, <i>Thomas 9936</i> (NY)‡              | KF820627 | EU055654 | KF819905         | NA               |
| <i>Clidemia capitata</i> Benth.                            | Ocampo and Almeda [31]                        | KF820628 | AY460471 | KF819906         | KF821830         |
| <i>Clidemia capitellata</i> (Bonpl.) D. Don                | Brazil, <i>Irwin 27199</i> (NY)‡              | KF820629 | EU055655 | KF819907         | KF821831         |
| <i>Clidemia caudata</i> Wurdack                            | Ocampo and Almeda [31]                        | KF820631 | KF821428 | KF819908         | KF821833         |
| <i>Clidemia charadrophylla</i> Tutin                       | Ocampo and Almeda [31]                        | KF820632 | KF821429 | KF819909         | KF821834         |
| <i>Clidemia ciliata</i> Pav. ex D. Don                     | Ocampo and Almeda [31]                        | KF820633 | AY460472 | KF819910         | KF821835         |
| <i>Clidemia clandestina</i> Almeda                         | Ocampo and Almeda [31]                        | KF820634 | EU055656 | KF819911         | KF821836         |
| <i>Clidemia conglomerata</i> DC.                           | Guyana, <i>Clarke 828</i> (CAS)*              | KF820635 | EF418798 | KF819912         | KF821837         |
| <i>Clidemia costaricensis</i> Cogn. & Gleason ex Gleason   | Costa Rica, <i>Herrera 333</i> (NY)‡          | KF820636 | EU055657 | KF819913         | KF821838         |
| <i>Clidemia crenulata</i> Gleason                          | Ocampo and Almeda [31]                        | KF820637 | EF418799 | NA               | NA               |
| <i>Clidemia densiflora</i> (Standl.) Gleason               | Ocampo and Almeda [31]                        | KF820643 | EU055658 | KF819917         | KF821843         |
| <i>Clidemia dentata</i> D. Don                             | Venezuela, <i>Cruxent 235</i> (NY)‡           | KF820644 | EF418800 | KF819918         | KF821844         |
| <i>Clidemia dimorphica</i> J.F. Macbr.                     | Peru, <i>McDaniel 15255</i> (NY)‡             | KF820645 | AY460476 | KF819919         | KF821845         |
| <i>Clidemia discolor</i> (Triana) Cogn.                    | Ocampo and Almeda [31]                        | KF820646 | EU055659 | KF819920         | KF821846         |
| <i>Clidemia domingensis</i> (DC.) Cogn.                    | Ocampo and Almeda [31]                        | KF820648 | EU055660 | NA               | KF821848         |
| <i>Clidemia epiphytica</i> (Triana) Cogn.                  | Ecuador, <i>Clark 539</i> (NY)‡               | KF820651 | EF418801 | KF819923         | KF821851         |
| <i>Clidemia fendleri</i> Cogn.                             | Ocampo and Almeda [31]                        | KF820654 | AY460477 | NA               | KF821854         |
| <i>Clidemia folsomii</i> Almeda                            | Panama, <i>Almeda 5899</i> (NY)‡              | KF820655 | EU055661 | KF819926         | KF821855         |
| <i>Clidemia garciabarrigae</i> Wurdack                     | Ocampo and Almeda [31]                        | NA       | EU055662 | NA               | NA               |
| <i>Clidemia globuliflora</i> (Cogn.) L.O. Williams         | Ocampo and Almeda [31]                        | KF820657 | KF821437 | KF819927         | KF821857         |
| <i>Clidemia gracilis</i> Pittier                           | Colombia, <i>Acevedo-Rodríguez 6779</i> (NY)‡ | KF820659 | KF821439 | KF819929         | KF821859         |
| <i>Clidemia heteroneura</i> (Schrank & Mart. ex DC.) Cogn. | Brazil, <i>Poole 2064</i> (NY)‡               | KF820664 | AY460478 | KF819932         | KF821864         |
| <i>Clidemia heterophylla</i> (Desr.) Gleason               | NA, <i>Baker 5971</i> (NY)‡                   | KF820665 | EU055663 | KF819933         | KF821865         |
| <i>Clidemia hirta</i> (L.) D. Don                          | Brazil, <i>Romero 375</i> (NY)‡               | KF820666 | AY460479 | KF819934         | KF821866         |

|                                                    |                                                 |          |          |          |          |
|----------------------------------------------------|-------------------------------------------------|----------|----------|----------|----------|
| <i>Clidemia inobsepta</i> Wurdack                  | Ocampo and Almeda [31]                          | KF820667 | EU055664 | KF819935 | KF821867 |
| <i>Clidemia involuocrata</i> DC.                   | NA, <i>Maguire 33768</i> (NY)‡                  | KF820668 | EF418804 | KF819936 | KF821868 |
| <i>Clidemia monantha</i> L.O.Williams              | Ocampo and Almeda [31]                          | KF820672 | EU055665 | NA       | KF821872 |
| <i>Clidemia ombrophila</i> Gleason                 | Costa Rica, <i>Almeda 5441</i> (NY)‡            | KF820680 | EU055667 | KF819943 | KF821880 |
| <i>Clidemia pittieri</i> Gleason                   | Ocampo and Almeda [31]                          | KF820684 | EU055668 | KF819945 | KF821884 |
| <i>Clidemia plumosa</i> (Desr.) DC.                | Venezuela, <i>Weitzman 84</i> (NY)‡             | KF820685 | EU055669 | KF819946 | KF821885 |
| <i>Clidemia pustulata</i> DC.                      | Ocampo and Almeda [31]                          | KF820687 | KF821455 | KF819948 | KF821887 |
| <i>Clidemia radicans</i> Cogn.                     | Costa Rica, <i>Brenes 13520</i> (NY)‡           | KF820689 | EU055670 | KF819950 | KF821889 |
| <i>Clidemia reitziana</i> Cogn. & Gleason          | Ocampo and Almeda [31]                          | KF820690 | KF821457 | KF819951 | KF821890 |
| <i>Clidemia rubra</i> (Aublet) Martius             | Ocampo and Almeda [31]                          | KF820692 | AY460481 | KF819953 | KF821892 |
| <i>Clidemia septuplinervia</i> Cogn.               | Ecuador, <i>Jativa 1040</i> (NY)‡               | KF820694 | AY460482 | KF819954 | KF821894 |
| <i>Clidemia setosa</i> (Triana) Gleason            | Ocampo and Almeda [31]                          | KF820698 | EU055671 | KF819957 | KF821898 |
| <i>Clidemia tenebrosa</i> Almeda                   | Ocampo and Almeda [31]                          | KF820707 | EU055672 | KF819965 | KF821907 |
| <i>Clidemia trichosantha</i> Almeda                | Panama, <i>Almeda 6491</i> (NY)‡                | KF820708 | EU055673 | KF819966 | KF821908 |
| <i>Clidemia trinitensis</i> (Crueg.) Griseb.       | Trinidad and Tobago, <i>Fendler 987</i> (NY)‡   | KF820710 | EF418806 | NA       | KF821910 |
| <i>Clidemia umbellata</i> (Mill.) L.O.Williams     | Ocampo and Almeda [31]                          | KF820711 | EU055674 | KF819967 | KF821911 |
| <i>Clidemia umbrosa</i> (Sw.) Cogn.                | Ocampo and Almeda [31]                          | KF820712 | EF418807 | KF819968 | KF821912 |
| <i>Clidemia urceolata</i> DC.                      | Brazil, <i>Hatschbach 47432</i> (NY)‡           | KF820713 | EU055675 | NA       | KF821913 |
| <i>Clidemia wrightii</i> Griseb.                   | Cuba, <i>HFC 79750</i> (HAJB)‡                  | KF820716 | KF821470 | KF819971 | KF821916 |
| <i>Conostegia bigibbosa</i> Cogn.                  | Ocampo and Almeda [31]                          | KF820718 | AY460485 | KF819973 | KF821918 |
| <i>Conostegia icosandra</i> (Sw. ex Wikstr.) Urb.  | Guadeloupe, <i>Martin 488</i> (NY)‡             | KF820719 | AY460486 | KF819974 | KF821919 |
| <i>Conostegia lasiopoda</i> Benth.                 | Ocampo and Almeda [31]                          | KF820720 | KF821472 | KF819975 | KF821920 |
| <i>Conostegia macrantha</i> O.Berg ex Triana       | Ocampo and Almeda [31]                          | KF820721 | EF418809 | KF819976 | KF821921 |
| <i>Conostegia montana</i> (Sw.) D.Don ex DC.       | Guatemala, <i>Stevens 25434</i> (NY)‡           | KF820722 | AY460488 | KF819977 | KF821922 |
| <i>Conostegia monteagreana</i> Cogn.               | Panama, <i>Almeda 6075</i> (NY)‡                | KF820723 | EF418810 | KF819978 | KF821923 |
| <i>Conostegia oerstediana</i> O.Berg ex Triana     | Ocampo and Almeda [31]                          | KF820724 | KF821473 | KF819979 | KF821924 |
| <i>Conostegia pittieri</i> Cogn. ex T.Durand       | Costa Rica, <i>Bello &amp; Cruz 2704</i> (CAS)* | KF820725 | EU055678 | KF819980 | KF821925 |
| <i>Conostegia rhodopetala</i> Donn. Sm.            | Costa Rica, <i>Schnell 1081</i> (NY)‡           | KF820726 | EU055679 | KF819981 | KF821926 |
| <i>Conostegia rufescens</i> Naudin                 | Panama, <i>McPherson 12553</i> (NY)‡            | KF820727 | AY460489 | KF819982 | KF821927 |
| <i>Conostegia setosa</i> Triana                    | Ecuador, <i>Freire 1060</i> (NY)‡               | KF820728 | EU055680 | KF819983 | KF821928 |
| <i>Conostegia speciosa</i> Naudin                  | Ocampo and Almeda [31]                          | KF820729 | AY460490 | KF819984 | KF821929 |
| <i>Conostegia subcrustulata</i> (Beurling) Triana  | Ocampo and Almeda [31]                          | KF820730 | EU055681 | KF819985 | KF821930 |
| <i>Conostegia superba</i> Naudin                   | Honduras, <i>McDougal et al. 3281</i> (CAS)*    | KF820731 | KF821474 | KF819986 | KF821931 |
| <i>Conostegia tenuifolia</i> Donn. Sm.             | Panama, <i>Gentry 16821</i> (NY)‡               | KF820732 | AY460491 | KF819987 | KF821932 |
| <i>Conostegia xalapensis</i> (Bonpl.) D.Don ex DC. | Ocampo and Almeda [31]                          | KF820733 | EU055682 | KF819988 | KF821933 |
| <i>Leandra acutiflora</i> (Naudin) Cogn.           | Brazil, <i>Dusen 15044</i> (NY)‡                | KF820758 | EF418813 | KF820010 | NA       |
| <i>Leandra adenothrix</i> Cogn.                    | Brazil, <i>Irwin 26014</i> (NY)‡                | KF820759 | EF418814 | NA       | KF821955 |
| <i>Leandra agrestis</i> (Aublet) Raddi             | Ocampo and Almeda [31]                          | KF820760 | EF418815 | KF820011 | KF821956 |
| <i>Leandra aristigera</i> (Naudin) Cogn.           | Ecuador, <i>Brandbyge 33882</i> (NY)‡           | KF820762 | EF418816 | NA       | KF821957 |
| <i>Leandra australis</i> (Cham.) Cogn.             | Brazil, <i>Sobral 1459</i> (NY)‡                | KF820766 | EU055686 | KF820014 | KF821960 |
| <i>Leandra barbinervis</i> (Cham. ex Triana) Cogn. | Brazil, <i>Lacerda 271</i> (NY)‡                | KF820767 | EF418817 | KF820015 | KF821961 |
| <i>Leandra carassana</i> (DC.) Cogn.               | Brazil, <i>Harley 52598</i> (NY)‡               | KF820771 | EU055688 | NA       | KF821965 |
| <i>Leandra chaetodon</i> (DC.) Cogn.               | Peru, Rimachi 6980 (NY)‡                        | KF820776 | KF821499 | KF820020 | KF821967 |
| <i>Leandra clidemoides</i> (Naudin) Wurdack        | Brazil, <i>Carvalho 6119</i> (NY)‡              | KF820777 | EF418820 | KF820021 | KF821968 |
| <i>Leandra coadunata</i> Wurdack                   | Brazil, <i>Nee 42635</i> (NY)‡                  | KF820778 | EF418821 | KF820022 | KF821969 |
| <i>Leandra dichotoma</i> (Pav. ex D.Don) Cogn.     | Ocampo and Almeda [31]                          | KF820782 | EF418825 | KF820026 | KF821973 |
| <i>Leandra divaricata</i> (Naudin) Cogn.           | Ocampo and Almeda [31]                          | KF820783 | EF418827 | NA       | KF821974 |

|                                              |                                               |          |          |          |          |
|----------------------------------------------|-----------------------------------------------|----------|----------|----------|----------|
| <i>Leandra edentula</i> Gleason              | Guyana, <i>Boom 8971</i> (NY)‡                | KF820785 | EF418829 | NA       | KF821976 |
| <i>Leandra fallacissima</i> Markgr.          | Ocampo and Almeda [31]                        | KF820787 | NA       | NA       | NA       |
| <i>Leandra fragilis</i> Cogn.                | Brazil, <i>Harley 20163</i> (NY)‡             | KF820789 | EF418830 | KF820030 | KF821980 |
| <i>Leandra glandulifera</i> (Triana) Cogn.   | Venezuela, <i>Wurdack 43448</i> (NY)‡         | KF820791 | EF418832 | NA       | KF821982 |
| <i>Leandra granatensis</i> Gleason           | Ocampo and Almeda [31]                        | KF820794 | EU055691 | KF820034 | KF821985 |
| <i>Leandra humilis</i> (Cogn.) Wurdack       | Brazil, <i>Romero 10207</i> (NY)‡             | KF820774 | EF418834 | KF820038 | KF821988 |
| <i>Leandra inaequalifolia</i> (DC) Cogn.     | Brazil, <i>Jobert 854</i> (NY)‡               | KF820798 | EF418835 | KF820039 | KF821989 |
| <i>Leandra ionopogon</i> (Mart.) Cogn.       | Brazil, <i>Thomas 9280</i> (NY)‡              | KF820799 | EF418836 | KF820040 | KF821990 |
| <i>Leandra lima</i> (Desr.) Judd & Skean     | Dominican Republic, <i>Judd 5172</i> (NY)‡    | KF820802 | AY460493 | NA       | KF821994 |
| <i>Leandra longicoma</i> Cogn.               | Ocampo and Almeda [31]                        | KF820803 | EF418839 | NA       | KF821995 |
| <i>Leandra macdanielii</i> Wurdack           | Ocampo and Almeda [31]                        | KF820807 | AY460494 | KF820047 | KF821999 |
| <i>Leandra melanodesma</i> (Naudin) Cogn.    | Ocampo and Almeda [31]                        | KF820809 | EU055695 | KF820049 | KF822001 |
| <i>Leandra mexicana</i> (Naudin) Cogn.       | Belize, <i>Nee et al. 46915</i> (CAS)*        | KF820811 | AY460492 | NA       | KF822003 |
| <i>Leandra micropetala</i> (Naudin) Cogn.    | Brazil, <i>Nee 42692</i> (NY)‡                | KF820812 | EF418842 | NA       | KF822004 |
| <i>Leandra nanayensis</i> Wurdack            | Peru, <i>McDaniel 20287</i> (NY)‡             | KF820814 | EF418843 | KF820052 | KF822006 |
| <i>Leandra nervosa</i> (Naudin) Cogn.        | Ecuador, <i>Asplund 16912</i> (NY)‡           | NA       | EU055696 | KF820053 | KF822007 |
| <i>Leandra purpurascens</i> (DC.) Cogn.      | Brazil, <i>Reitz 7138</i> (NY)‡               | KF820820 | EU055699 | KF820058 | KF822012 |
| <i>Leandra purpurea</i> Gleason              | Guyana, <i>McDowell 3588</i> (NY)‡            | KF820821 | EF418849 | NA       | KF822013 |
| <i>Leandra quinquentata</i> (DC.) Cogn.      | Brazil, <i>Plowman 10136</i> (NY)‡            | KF820823 | EF418867 | NA       | NA       |
| <i>Leandra regnellii</i> (Triana) Cogn.      | Brazil, <i>Molon s.n.</i> (NY)‡               | KF820826 | EF418851 | KF820062 | KF822017 |
| <i>Leandra reitzii</i> Wurdack               | Brazil, <i>Rosa 24</i> (NY)‡                  | KF820827 | EU055700 | KF820063 | NA       |
| <i>Leandra reversa</i> (DC.) Cogn.           | Ocampo and Almeda [31]                        | KF820828 | EU055701 | KF820064 | KF822018 |
| <i>Leandra rhamnifolia</i> (Naudin) Cogn.    | Ocampo and Almeda [31]                        | KF820829 | EU055702 | KF820065 | KF822019 |
| <i>Leandra riograndensis</i> (Brade) Wurdack | Brazil, <i>Caproglione s.n.</i> (NY)‡         | KF820830 | EF418852 | KF820066 | KF822020 |
| <i>Leandra rufescens</i> (DC.) Cogn.         | Brazil, <i>Amorim 2378</i> (NY)‡              | KF820833 | EF418853 | KF820069 | KF822023 |
| <i>Leandra salicina</i> (DC.) Cogn.          | Brazil, <i>Anderson 8457</i> (NY)‡            | KF820834 | EU055703 | NA       | NA       |
| <i>Leandra secunda</i> (D.Don) Cogn.         | Brazil, <i>Prance 16850</i> (NY)‡             | KF820835 | AY460495 | KF820070 | KF822024 |
| <i>Leandra secundiflora</i> (DC.) Cogn.      | Brazil, <i>Ferreira 3600</i> (NY)‡            | KF820836 | EF418855 | KF820071 | KF822025 |
| <i>Leandra subseriata</i> (Naudin) Cogn.     | Colombia, <i>Fosberg 21194</i> (NY)‡          | KF820841 | AY460496 | KF820075 | KF822029 |
| <i>Leandra subulata</i> Gleason              | Ocampo and Almeda [31]                        | KF820842 | AY460497 | KF820076 | KF822030 |
| <i>Leandra sulfurea</i> (Naudin) Cogn.       | Brazil, <i>Segadas-Vianna 2828</i> (NY)‡      | KF820843 | EF418863 | KF820077 | KF822031 |
| <i>Leandra ulaei</i> Cogn.                   | Brazil, <i>Lourteig 2367</i> (NY)‡            | KF820847 | EF418865 | KF820081 | KF822035 |
| <i>Leandra xanthocomma</i> (Naudin) Cogn.    | Brazil, <i>Reitz 17967</i> (NY)‡              | KF820849 | EF418868 | KF820083 | NA       |
| <i>Leandra xanthostachya</i> Cogn.           | Brazil, <i>Anderson 36036</i> (NY)‡           | KF820850 | EF418869 | KF820084 | NA       |
| <i>Maieta guianensis</i> Aublet              | Ocampo and Almeda [31]                        | KF820857 | AY460498 | KF820093 | KF822044 |
| <i>Maieta poeppigii</i> Martius ex Cogn.     | Ocampo and Almeda [31]                        | KF820858 | AY460499 | KF820094 | KF822045 |
| <i>Mecranium haemanthum</i> Triana ex Cogn.  | Ocampo and Almeda [31]                        | KF820862 | EF418871 | KF820098 | KF822049 |
| <i>Mecranium multiflorum</i> (Desr.) Triana  | Haiti, <i>Skean 1631</i> (NY)*                | KF820867 | EF418872 | KF820103 | KF822053 |
| <i>Mecranium ovatum</i> Cogn.                | Ocampo and Almeda [31]                        | KF820869 | EU055706 | KF820105 | KF822055 |
| <i>Mecranium puberulum</i> Cogn.             | Dominican Republic, <i>Zanoni 28316</i> (NY)‡ | KF820870 | EF418873 | KF820106 | KF822056 |
| <i>Mecranium septentrionale</i> Skean        | Ocampo and Almeda [31]                        | KF820872 | KF821535 | KF820108 | KF822058 |
| <i>Miconia aeruginosa</i> Naudin             | Ocampo and Almeda [31]                        | KF820895 | AY460501 | KF820128 | KF822081 |
| <i>Miconia alata</i> (Aublet) DC.            | Ocampo and Almeda [31]                        | KF820908 | KF821553 | KF820135 | KF822090 |
| <i>Miconia alborufescens</i> Naudin          | Brazil, <i>Prance P24922</i> (NY)‡            | KF820910 | EU055714 | KF820138 | KF822093 |
| <i>Miconia aliquidantula</i> Wurdack         | Ocampo and Almeda [31]                        | KF820911 | EF418881 | KF820139 | KF822094 |
| <i>Miconia amilcariana</i> Almeda & Dorr     | Venezuela, <i>Dorr et al. 8416</i> (CAS)*     | KF820971 | EU055746 | KF820195 | KF822156 |
| <i>Miconia amplinodis</i> Umaña & Almeda     | Ocampo and Almeda [31]                        | KF820915 | EU055715 | KF820143 | KF822098 |

|                                                        |                                                          |          |          |          |          |
|--------------------------------------------------------|----------------------------------------------------------|----------|----------|----------|----------|
| <i>Miconia appendiculata</i> Triana                    | Costa Rica, <i>Davidse &amp; Herrera 26232</i> (CAS)*    | KF820920 | EU055716 | KF820148 | KF822103 |
| <i>Miconia arboricola</i> Almeda                       | Ocampo and Almeda [31]                                   | KF820922 | EU055717 | KF820150 | KF822105 |
| <i>Miconia argentea</i> (Sw.) DC.                      | Ocampo and Almeda [31]                                   | KF820923 | AY460503 | KF820151 | KF822106 |
| <i>Miconia argyrophylla</i> DC.                        | Ocampo and Almeda [31]                                   | KF820925 | EF418882 | KF820153 | KF822108 |
| <i>Miconia aspergillar</i> (Bonpl.) Naudin             | Ecuador, <i>Boeke 2475</i> (NY)‡                         | KF820896 | EU055709 | KF820129 | KF822082 |
| <i>Miconia astroplocama</i> Donnell Smith              | Ocampo and Almeda [31]                                   | KF820927 | EU055719 | KF820155 | KF822110 |
| <i>Miconia aywardii</i> Wurdack                        | Ocampo and Almeda [31]                                   | KF820972 | NA       | KF820276 | KF822246 |
| <i>Miconia baracoensis</i> Urb.                        | Bécquer et al. [57]                                      | KF820934 | EF418883 | KF820161 | KF822117 |
| <i>Miconia barbeyana</i> Cogn.                         | Peru, <i>Smith 5593</i> (NY)‡                            | KF820935 | EU055721 | KF820162 | KF822118 |
| <i>Miconia benthamiana</i> Triana                      | Ocampo and Almeda [31]                                   | KF820937 | EU055722 | KF820164 | KF822120 |
| <i>Miconia biglandulosa</i> Gleason                    | Peru, <i>Bernardi 9/11</i> (NY)‡                         | KF820939 | EU055723 | KF820166 | KF822122 |
| <i>Miconia biperulifera</i> Cogn.                      | Ocampo and Almeda [31]                                   | NA       | EU055724 | NA       | KF822124 |
| <i>Miconia brachybotrya</i> Triana                     | Ocampo and Almeda [31]                                   | KF820942 | EU055725 | KF820168 | KF822126 |
| <i>Miconia bracteata</i> (DC.) Triana                  | Brazil, <i>Mori 17199</i> (NY)‡                          | KF820943 | EF418884 | KF820169 | KF822127 |
| <i>Miconia bracteolata</i> (Bonpl.) DC.                | Ocampo and Almeda [31]                                   | KF820944 | EU055726 | KF820170 | KF822128 |
| <i>Miconia brasiliensis</i> (Spreng.) Triana           | Brazil, <i>Klein 107</i> (NY)‡                           | KF820945 | EU055727 | NA       | NA       |
| <i>Miconia brenesii</i> Standl.                        | Costa Rica, <i>Penneys 269</i> (CAS)*                    | KF820946 | EU055728 | KF820171 | KF822129 |
| <i>Miconia brevitheca</i> Gleason                      | Ocampo and Almeda [31]                                   | KF820947 | EU055729 | KF820172 | KF822130 |
| <i>Miconia brunnea</i> DC.                             | Ocampo and Almeda [31]                                   | KF820948 | EU055730 | KF820173 | KF822131 |
| <i>Miconia bubalina</i> (D.Don) Naudin                 | Ocampo and Almeda [31]                                   | KF820949 | EU055731 | NA       | KF822132 |
| <i>Miconia buddlejoides</i> Triana                     | Brazil, <i>Klein 1239</i> (NY)‡                          | KF820950 | EU055732 | KF820174 | KF822133 |
| <i>Miconia bullata</i> (Turcz.) Triana                 | Ocampo and Almeda [31]                                   | KF820951 | EU055733 | KF820175 | KF822134 |
| <i>Miconia cabucu</i> Hoehne                           | Brazil, <i>Dusen 17341</i> (NY)‡                         | KF820952 | EU055734 | NA       | KF822135 |
| <i>Miconia calvescens</i> DC.                          | Ocampo and Almeda [31]                                   | KF820955 | NA       | KF820178 | KF822138 |
| <i>Miconia calycina</i> Cogn.                          | Ocampo and Almeda [31]                                   | KF820956 | EU055737 | KF820179 | KF822139 |
| <i>Miconia campestris</i> (Benth.) Triana              | Ocampo and Almeda [31]                                   | KF820957 | KF821573 | NA       | KF822140 |
| <i>Miconia caudigera</i> DC.                           | Ocampo and Almeda [31]                                   | KF820963 | EU055740 | KF820185 | KF822146 |
| <i>Miconia cerasiflora</i> Urb.                        | Cuba, <i>HFC 82487</i> (HAJB)‡                           | KF820968 | EU055743 | KF820191 | KF822152 |
| <i>Miconia cercophora</i> Wurdack                      | Ocampo and Almeda [31]                                   | KF820969 | EU055745 | KF820192 | KF822153 |
| <i>Miconia chamissois</i> Naudin                       | El Salvador, <i>Monterrosa &amp; Carballo 791</i> (CAS)* | KF820974 | EU055748 | KF820197 | KF822158 |
| <i>Miconia chartacea</i> Triana                        | Ocampo and Almeda [31]                                   | KF820975 | EU055749 | KF820198 | KF822159 |
| <i>Miconia chrysophylla</i> (Richard) Urban            | Ocampo and Almeda [31]                                   | KF820977 | EU055750 | KF820200 | KF822161 |
| <i>Miconia ciliata</i> (Rich.) DC.                     | Venezuela, <i>Tate 1133</i> (NY)‡                        | KF820979 | KF821581 | KF820201 | KF822162 |
| <i>Miconia cinerascens</i> Miquel                      | Ocampo and Almeda [31]                                   | KF820981 | EU055751 | KF820202 | KF822164 |
| <i>Miconia cinnamomifolia</i> (DC.) Naudin             | Brazil, <i>Martins 6680</i> (NY)‡                        | KF820982 | EU055753 | KF820204 | KF822166 |
| <i>Miconia collatata</i> Wurdack                       | Brazil, <i>Prance 59642</i> (NY)‡                        | KF820986 | EU055754 | KF820207 | KF822170 |
| <i>Miconia concinna</i> Almeda                         | Panama, <i>McPherson 11373</i> (CAS)*                    | KF820988 | EU055755 | KF820209 | KF822172 |
| <i>Miconia corymbiformis</i> Cogn.                     | Ecuador, <i>Ortiz et al. 307</i> (CAS)*                  | KF820992 | EU055756 | KF820213 | KF822176 |
| <i>Miconia costaricensis</i> Cogn.                     | Ocampo and Almeda [31]                                   | KF820993 | EU055757 | KF820214 | KF822177 |
| <i>Miconia crocata</i> Almeda                          | Panama, <i>Almeda et al. 6388</i> (CAS)*                 | KF820997 | EU055759 | KF820217 | KF822181 |
| <i>Miconia crocea</i> (Desr.) Naudin                   | Ecuador, <i>Harling &amp; Andersson 23467</i> (CAS)*     | KF820998 | EU055760 | KF820218 | KF822182 |
| <i>Miconia cubatanensis</i> Hoehne                     | Brazil, <i>Mexia 5776</i> (NY)‡                          | KF820999 | EU055761 | KF820219 | KF822183 |
| <i>Miconia cubensis</i> (C.Wright ex Griseb.) C.Wright | Ocampo and Almeda [31]                                   | KF821000 | EU055762 | KF820220 | KF822184 |
| <i>Miconia dapsiliflora</i> Wurdack                    | Ecuador, <i>Penneys 1898</i> (FLAS)‡                     | KF821006 | EU055763 | KF820225 | KF822189 |
| <i>Miconia delicatula</i> A.Rich.                      | Cuba, <i>HFC 82421</i> (HAJB)‡                           | NA       | EU055764 | NA       | NA       |
| <i>Miconia denticulata</i> Naudin                      | Ocampo and Almeda [31]                                   | KF821009 | EU055765 | KF820228 | KF822192 |
| <i>Miconia desportesii</i> Urban                       | Ocampo and Almeda [31]                                   | KF821011 | EF418887 | KF820229 | KF822194 |

|                                                |                                                       |          |          |          |          |
|------------------------------------------------|-------------------------------------------------------|----------|----------|----------|----------|
| <i>Miconia dielsiana</i> Urban                 | Ocampo and Almeda [31]                                | KF821014 | EU055766 | KF820232 | KF822197 |
| <i>Miconia discolor</i> DC.                    | Argentina, <i>Mulgura 1918</i> (NY)‡                  | KF821015 | EU055767 | KF820233 | KF822198 |
| <i>Miconia dispar</i> Benth.                   | Ocampo and Almeda [31]                                | KF821016 | KF821597 | KF820234 | KF822199 |
| <i>Miconia dissita</i> Almeda                  | Panama, <i>Croat &amp; Zhu 76484</i> (CAS)*           | KF821017 | EU055768 | KF820235 | KF822200 |
| <i>Miconia dodecandra</i> Cogn.                | Ocampo and Almeda [31]                                | KF821020 | KF821600 | NA       | NA       |
| <i>Miconia dolichopoda</i> Naudin              | Ocampo and Almeda [31]                                | KF821022 | KF821601 | KF820239 | KF822204 |
| <i>Miconia dolichorrhyncha</i> Naudin          | Ocampo and Almeda [31]                                | KF821023 | KF821602 | KF820240 | KF822205 |
| <i>Miconia doriana</i> Cogn.                   | Brazil, <i>Fiaschi 1375</i> (NY)‡                     | KF821025 | EU055771 | KF820241 | KF822207 |
| <i>Miconia duckei</i> Cogn.                    | Ocampo and Almeda [31]                                | KF821028 | AY460508 | NA       | KF822210 |
| <i>Miconia elvirae</i> Wurdack                 | Venezuela, <i>Dorr et al. 5012</i> (NY)*              | KF821033 | EU055773 | KF820248 | KF822215 |
| <i>Miconia ernstii</i> Wurdack                 | Ocampo and Almeda [31]                                | KF821036 | EF418889 | KF820251 | KF822218 |
| <i>Miconia fasciculata</i> Gardner             | Brazil, <i>Kozera 1427</i> (NY)‡                      | KF821037 | EU055774 | KF820252 | KF822219 |
| <i>Miconia ferruginea</i> (Desr.) DC.          | Ocampo and Almeda [31]                                | KF821039 | KF821611 | KF820253 | KF822221 |
| <i>Miconia floribunda</i> (Bonpl.) DC.         | NA, <i>Rusby 792</i> (NY)‡                            | KF821040 | EU055775 | KF820254 | KF822222 |
| <i>Miconia foveolata</i> Cogn.                 | Ocampo and Almeda [31]                                | KF821041 | AY460511 | KF820255 | KF822223 |
| <i>Miconia friedmaniorum</i> Almeda & Umaña    | Ocampo and Almeda [31]                                | KF821042 | EU055776 | KF820257 | KF822225 |
| <i>Miconia furfuracea</i> (Vahl) Griseb.       | Ocampo and Almeda [31]                                | KF821044 | EU055777 | KF820260 | KF822228 |
| <i>Miconia glandulifera</i> Cogn.              | Ocampo and Almeda [31]                                | KF821046 | KF821614 | KF820262 | KF822230 |
| <i>Miconia gonostigma</i> Triana               | Panama, <i>Sytsma 1513</i> (CAS)*                     | KF821050 | EU055778 | KF820266 | KF822234 |
| <i>Miconia gratissima</i> Benth. ex Triana     | Ocampo and Almeda [31]                                | KF821054 | KF821620 | KF820269 | KF822238 |
| <i>Miconia hemenostigma</i> Naudin             | Ocampo and Almeda [31]                                | KF820900 | EU055780 | KF820271 | KF822240 |
| <i>Miconia holosericea</i> (L.) DC.            | Ocampo and Almeda [31]                                | KF821057 | KF821623 | NA       | KF822242 |
| <i>Miconia hookeriana</i> Triana               | Ocampo and Almeda [31]                                | KF821059 | EU055781 | KF820274 | KF822244 |
| <i>Miconia hyemalis</i> St.-Hil. & Naudin      | Ocampo and Almeda [31]                                | KF820973 | EU055782 | KF820194 | KF822155 |
| <i>Miconia hypoleuca</i> (Benth.) Triana       | Ocampo and Almeda [31]                                | KF821062 | EU055784 | KF820278 | KF822248 |
| <i>Miconia ibaguensis</i> (Bonpl.) Triana      | Ocampo and Almeda [31]                                | KF821063 | EU055785 | KF820279 | KF822249 |
| <i>Miconia impetiolaris</i> (Sw.) D.Don ex DC. | Dominican Republic, <i>Zanoni et al. 41170</i> (CAS)* | KF821064 | AY460513 | KF820280 | KF822250 |
| <i>Miconia inconspicua</i> Miquel              | Ocampo and Almeda [31]                                | KF821065 | EU055786 | KF820281 | KF822251 |
| <i>Miconia jahnii</i> Pittier                  | Ocampo and Almeda [31]                                | KF821069 | KF821628 | NA       | KF822255 |
| <i>Miconia jucunda</i> (DC.) Triana            | Ocampo and Almeda [31]                                | KF821073 | EU055789 | KF820288 | KF822259 |
| <i>Miconia krugii</i> Cogn.                    | Ocampo and Almeda [31]                                | KF821077 | EF418892 | KF820290 | KF822263 |
| <i>Miconia lacera</i> (Bonpl.) Naudin          | Ocampo and Almeda [31]                                | KF821079 | AY460514 | NA       | KF822265 |
| <i>Miconia laevigata</i> (L.) DC.              | Ocampo and Almeda [31]                                | NA       | AY460515 | KF820292 | KF822266 |
| <i>Miconia lanceolata</i> (Desr.) DC.          | Ocampo and Almeda [31]                                | KF821080 | KF821634 | KF820293 | KF822267 |
| <i>Miconia latecrenata</i> (DC.) Naudin        | Ocampo and Almeda [31]                                | KF821082 | KF821636 | KF820296 | KF822270 |
| <i>Miconia latifolia</i> (D.Don) Naudin        | Ocampo and Almeda [31]                                | KF821084 | EF208214 | KF820297 | KF822271 |
| <i>Miconia leiotricha</i> Wurdack              | Ocampo and Almeda [31]                                | KF821085 | AY46046  | KF820298 | KF822272 |
| <i>Miconia lepidota</i> DC.                    | Ocampo and Almeda [31]                                | KF821088 | EU055792 | KF820300 | KF822275 |
| <i>Miconia ligulata</i> Almeda                 | Ocampo and Almeda [31]                                | KF821090 | EF418894 | KF820302 | KF822277 |
| <i>Miconia ligustrina</i> (Smith) Triana       | Ocampo and Almeda [31]                                | KF821091 | EU055793 | KF820303 | KF822278 |
| <i>Miconia ligustroides</i> (DC.) Naudin       | Brazil, <i>Smith 12332</i> (NY)‡                      | KF821092 | EU055794 | KF820304 | KF822279 |
| <i>Miconia livida</i> Triana                   | Ocampo and Almeda [31]                                | KF821093 | KF821639 | KF820305 | KF822280 |
| <i>Miconia longicuspis</i> Cogn.               | Ocampo and Almeda [31]                                | KF821097 | EU055796 | KF820309 | KF822284 |
| <i>Miconia longifolia</i> (Aubl.) DC.          | Guyana, <i>Clarke 2733</i> (NY)‡                      | KF821098 | EF418895 | KF820310 | KF822285 |
| <i>Miconia longispicata</i> Triana             | Ocampo and Almeda [31]                                | KF821099 | EU055797 | KF820311 | KF822286 |
| <i>Miconia loreyoides</i> Triana               | Ocampo and Almeda [31]                                | KF821100 | EU055798 | KF820312 | KF822287 |
| <i>Miconia luteola</i> Cogn.                   | Ocampo and Almeda [31]                                | KF821103 | EU055799 | KF820315 | KF822290 |

|                                                      |                                           |          |          |          |          |
|------------------------------------------------------|-------------------------------------------|----------|----------|----------|----------|
| <i>Miconia lymanii</i> Wurdack                       | Ocampo and Almeda [31]                    | KF821105 | EU055800 | KF820317 | KF822292 |
| <i>Miconia magdalenae</i> Triana                     | Ocampo and Almeda [31]                    | KF821108 | EF418896 | KF820320 | KF822295 |
| <i>Miconia manicata</i> Cogn. & Gleason              | Ocampo and Almeda [31]                    | KF821109 | EU055801 | KF820321 | KF822296 |
| <i>Miconia marginata</i> Triana                      | Ocampo and Almeda [31]                    | KF821110 | KF821650 | KF820325 | KF822300 |
| <i>Miconia melanotricha</i> (Triana) Gleason         | Ocampo and Almeda [31]                    | KF821114 | EU055802 | KF820326 | KF822301 |
| <i>Miconia melinonis</i> Naudin                      | Brazil, Santos 238 (NY)*                  | KF821115 | EF418898 | KF820327 | KF822302 |
| <i>Miconia minutiflora</i> (Bonpl.) DC.              | Brazil, Maguire 40254 (NY)‡               | KF821124 | KF821656 | KF820335 | KF822310 |
| <i>Miconia mirabilis</i> (Aubl.) L.O.Williams        | Dominica, Wilbur et al. 8190 (CAS)*       | KF821125 | EU055806 | KF820337 | KF822312 |
| <i>Miconia molybdea</i> Naudin                       | Ocampo and Almeda [31]                    | KF821127 | KF821658 | KF820339 | KF822314 |
| <i>Miconia multispicata</i> Naudin                   | Ocampo and Almeda [31]                    | KF821130 | EU055808 | KF820342 | KF822317 |
| <i>Miconia nitidissima</i> Cogn.                     | Ocampo and Almeda [31]                    | KF821134 | EU055809 | NA       | KF822322 |
| <i>Miconia nystroemii</i> Ekman ex Urban             | Ocampo and Almeda [31]                    | KF821137 | KF821666 | KF820349 | KF822325 |
| <i>Miconia octopetala</i> Cogn.                      | Ocampo and Almeda [31]                    | KF821140 | EU055810 | KF820352 | KF822328 |
| <i>Miconia oldemanii</i> Wurdack                     | Ocampo and Almeda [31]                    | KF821142 | EF418899 | KF820353 | KF822330 |
| <i>Miconia pachyphylla</i> Cogn.                     | Ocampo and Almeda [31]                    | KF821145 | AY460519 | KF820356 | KF822333 |
| <i>Miconia papillosa</i> (Desr.) Naudin              | Ocampo and Almeda [31]                    | KF821147 | EU055812 | KF820358 | KF822335 |
| <i>Miconia pepericarpa</i> Mart. ex DC.              | Brazil, Irwin 27393 (NY)‡                 | NA       | EU055814 | NA       | NA       |
| <i>Miconia phanerostila</i> Pilger                   | Ocampo and Almeda [31]                    | KF821155 | KF821677 | KF820366 | KF822343 |
| <i>Miconia plumosa</i> Gleason                       | Guyana, Forest Department F1321 (NY)*     | KF821160 | EU055817 | KF820371 | KF822347 |
| <i>Miconia poeppigii</i> Triana                      | Ocampo and Almeda [31]                    | KF821161 | EU055818 | KF820372 | KF822348 |
| <i>Miconia polyandra</i> Gardner                     | Ocampo and Almeda [31]                    | KF821163 | EU055819 | KF820374 | KF822350 |
| <i>Miconia polygama</i> Cogn.                        | Ocampo and Almeda [31]                    | KF821164 | KF821682 | KF820375 | KF822351 |
| <i>Miconia prasina</i> (Sw.) DC.                     | Ocampo and Almeda [31]                    | KF821165 | AY460520 | KF820376 | KF822352 |
| <i>Miconia procumbens</i> (Gleason) Wurdack          | Ocampo and Almeda [31]                    | KF821167 | AY460521 | KF820377 | KF822354 |
| <i>Miconia pseudoaplostachya</i> Cogn.               | Guyana, Clarke et al. 2120 (CAS)*         | KF821168 | EF418900 | KF820378 | KF822355 |
| <i>Miconia pubipetala</i> Miquel                     | Ocampo and Almeda [31]                    | KF821172 | EF418901 | KF820380 | KF822359 |
| <i>Miconia pulvinata</i> Gleason                     | Ocampo and Almeda [31]                    | KF821174 | AY460522 | KF820381 | KF822360 |
| <i>Miconia punctata</i> (Desr.) D.Don ex DC.         | Ocampo and Almeda [31]                    | KF821175 | EU055821 | KF820382 | KF822361 |
| <i>Miconia pusilliflora</i> (DC.) Naudin             | Ocampo and Almeda [31]                    | KF821176 | EU055822 | KF820384 | KF822363 |
| <i>Miconia pyramidalis</i> (Desr.) DC.               | Ocampo and Almeda [31]                    | KF821178 | EF418902 | KF820386 | KF822365 |
| <i>Miconia racemosa</i> (Aubl.) DC.                  | Guyana, Redden 1086 (NY)‡                 | KF821182 | EU055823 | KF820389 | KF822369 |
| <i>Miconia ramboi</i> Brade                          | Ocampo and Almeda [31]                    | KF821185 | EU055824 | KF820391 | KF822371 |
| <i>Miconia reducens</i> Triana                       | Ocampo and Almeda [31]                    | KF821186 | EU055825 | NA       | KF822372 |
| <i>Miconia rigidiuscula</i> Cogn.                    | Brazil, Fritsch et al. 1810 (CAS)*        | KF821190 | EU055826 | KF820395 | KF822376 |
| <i>Miconia rimalis</i> Naudin                        | Ocampo and Almeda [31]                    | KF821191 | EU055827 | KF820396 | KF822377 |
| <i>Miconia robinsoniana</i> Cogn.                    | Ecuador, Stewart 3044 (CAS)*              | KF821192 | EU055828 | KF820397 | KF822378 |
| <i>Miconia rosea</i> Gleason                         | Ocampo and Almeda [31]                    | KF821194 | KF821695 | KF820398 | KF822380 |
| <i>Miconia rubiginosa</i> (Bonpl.) DC.               | Ocampo and Almeda [31]                    | KF821196 | AY460525 | KF820399 | KF822382 |
| <i>Miconia rufescens</i> (Aublet) DC.                | Ocampo and Almeda [31]                    | KF821198 | AY460526 | KF820401 | KF822384 |
| <i>Miconia salicifolia</i> (Bonpl. ex Naudin) Naudin | Ecuador, Holm-Nielsen et al. 29021 (CAS)* | NA       | EU055831 | NA       | KF822388 |
| <i>Miconia samanensis</i> Urban                      | Ocampo and Almeda [31]                    | KF821202 | EU055832 | KF820404 | KF822389 |
| <i>Miconia sanctiphilippi</i> Naudin                 | Ocampo and Almeda [31]                    | KF821203 | AY46052  | KF820405 | KF822390 |
| <i>Miconia schlechtendalii</i> Cogn.                 | Mexico, Breedlove 37751 (CAS)*            | KF821204 | EU055833 | KF820406 | KF822391 |
| <i>Miconia schlimii</i> Triana                       | Ocampo and Almeda [31]                    | KF821205 | EU055834 | KF820407 | KF822392 |
| <i>Miconia schnellii</i> Wurdack                     | Ocampo and Almeda [31]                    | KF821206 | AY460528 | KF820408 | KF822393 |
| <i>Miconia sclerophylla</i> Triana                   | Ocampo and Almeda [31]                    | KF821208 | EU055835 | KF820409 | KF822395 |
| <i>Miconia selleana</i> Urban & Ekman                | Ocampo and Almeda [31]                    | KF821209 | EF418904 | KF820410 | KF822396 |

|                                                  |                                         |          |          |          |          |
|--------------------------------------------------|-----------------------------------------|----------|----------|----------|----------|
| <i>Miconia sellowiana</i> Naudin                 | Ocampo and Almeda [31]                  | KF821210 | EU055836 | KF820411 | KF822397 |
| <i>Miconia septentrionalis</i> Judd & R.S.Beaman | Ocampo and Almeda [31]                  | KF821211 | EU055837 | KF820412 | KF822398 |
| <i>Miconia serrulata</i> (DC.) Naudin            | Ocampo and Almeda [31]                  | KF821212 | AY460535 | KF820413 | KF822399 |
| <i>Miconia sessilifolia</i> Naudin               | Ocampo and Almeda [31]                  | KF821213 | KF821700 | KF820414 | KF822400 |
| <i>Miconia simplex</i> Triana                    | Panama, <i>McPherson 20147</i> (CAS)*   | KF821214 | EU055838 | KF820415 | KF822401 |
| <i>Miconia sintenisii</i> Cogn.                  | Ocampo and Almeda [31]                  | KF821215 | AY460529 | KF820416 | KF822402 |
| <i>Miconia skeaniana</i> Judd                    | Ocampo and Almeda [31]                  | KF821216 | EU055839 | KF820417 | KF822403 |
| <i>Miconia smaragdina</i> Naudin                 | Ocampo and Almeda [31]                  | KF821217 | EU055840 | NA       | KF822404 |
| <i>Miconia sphagnicola</i> Urban & Ekman         | Ocampo and Almeda [31]                  | KF821221 | EU055841 | KF820418 | KF822405 |
| <i>Miconia spinulosa</i> Naudin                  | Venezuela, <i>Dorr 7739</i> (NY)‡       | KF821222 | AY460530 | KF820419 | KF822406 |
| <i>Miconia splendens</i> (Sw.) Griseb.           | Ocampo and Almeda [31]                  | KF821223 | KF821701 | KF820420 | KF822407 |
| <i>Miconia stenobotrys</i> (Richard) Naudin      | Ocampo and Almeda [31]                  | KF821227 | EU055842 | KF820426 | KF822414 |
| <i>Miconia stenostachya</i> DC.                  | Ocampo and Almeda [31]                  | KF821229 | EU055843 | KF820428 | KF822416 |
| <i>Miconia striata</i> (Vahl) Cogn.              | Dominica, <i>Barrier 3677</i> (NY)*     | KF821231 | EU055844 | KF820430 | KF822418 |
| <i>Miconia subcompressa</i> Urban                | Ocampo and Almeda [31]                  | KF821233 | EU055845 | KF820432 | KF822420 |
| <i>Miconia superba</i> Ule                       | Ocampo and Almeda [31]                  | KF821234 | EU055846 | KF820433 | KF822421 |
| <i>Miconia sylvatica</i> (Schltdl.) Naudin       | Ocampo and Almeda [31]                  | KF821235 | EU055847 | KF820434 | KF822422 |
| <i>Miconia tetrandra</i> (Sw.) D.Don             | Ocampo and Almeda [31]                  | KF821239 | EU055848 | KF820438 | KF822426 |
| <i>Miconia tetrastoma</i> Naudin                 | Ocampo and Almeda [31]                  | KF821240 | AY460532 | KF820439 | KF822427 |
| <i>Miconia thomasiana</i> DC.                    | Ocampo and Almeda [31]                  | KF821244 | EU055850 | KF820443 | KF822431 |
| <i>Miconia tomentosa</i> (Richard) D.Don ex DC.  | Ocampo and Almeda [31]                  | KF821248 | EF418905 | NA       | KF822435 |
| <i>Miconia trianae</i> Cogn.                     | Ocampo and Almeda [31]                  | KF821253 | EU055851 | KF820450 | KF822440 |
| <i>Miconia triangularis</i> Gleason              | Ocampo and Almeda [31]                  | KF821254 | EU055852 | KF820451 | KF822441 |
| <i>Miconia trimera</i> Wurdack                   | Ocampo and Almeda [31]                  | KF821255 | EF418907 | KF820452 | KF822442 |
| <i>Miconia triplinervis</i> Ruiz & Pav.          | Ocampo and Almeda [31]                  | KF821257 | EU055854 | KF820454 | KF822444 |
| <i>Miconia tristis</i> Spring                    | Brazil, <i>Brade 16594</i> (NY)‡        | KF821258 | EU055855 | KF820455 | KF822445 |
| <i>Miconia tschudyoides</i> Cogn.                | French Guiana, <i>Loubry 1345</i> (NY)‡ | KF821259 | EF418908 | KF820456 | KF822446 |
| <i>Miconia tuberculata</i> (Naudin) Triana       | Ocampo and Almeda [31]                  | KF821260 | AY460534 | KF820457 | KF822447 |
| <i>Miconia valtheri</i> Naudin                   | Ocampo and Almeda [31]                  | KF821267 | EU055857 | KF820464 | KF822454 |
| <i>Miconia villonacensis</i> Wurdack             | Ecuador, <i>Camp E-226</i> (NY)*        | KF820902 | EU055712 | KF820131 | KF822084 |
| <i>Miconia viscidula</i> Urban & Cogn.           | Ocampo and Almeda [31]                  | KF821269 | EF418910 | KF820466 | KF822456 |
| <i>Miconia willdenowii</i> Klotzsch ex Naudin    | Ocampo and Almeda [31]                  | KF821272 | EU055858 | KF820469 | KF822459 |
| <i>Necramium gigantophyllum</i> Britton          | Ocampo and Almeda [31]                  | KF821274 | AY460537 | KF820471 | KF822461 |
| <i>Ossaea amygdaloides</i> (DC.) Triana          | Brazil, <i>Gibbs 3525</i> (NY)‡         | KF821277 | KF821731 | KF820474 | KF822464 |
| <i>Ossaea brenesii</i> Standl.                   | Ocampo and Almeda [31]                  | KF821284 | EU055860 | KF820480 | KF822470 |
| <i>Ossaea capillaris</i> (D.Don) Cogn.           | Ocampo and Almeda [31]                  | KF821285 | EU055861 | KF820481 | KF822471 |
| <i>Ossaea coarctiflora</i> Wurdack               | NA, <i>Prance 1470</i> (NY)‡            | KF821286 | EF418911 | KF820482 | KF822472 |
| <i>Ossaea confertiflora</i> (DC.) Triana         | Brazil, <i>Goldenberg 766</i> (NY)‡     | KF821287 | KF821737 | KF820483 | KF822473 |
| <i>Ossaea congestiflora</i> Cogn.                | Brazil, <i>Irwin 12247</i> (NY)‡        | KF821288 | EF418912 | KF820484 | KF822474 |
| <i>Ossaea macrophylla</i> (Benth.) Cogn.         | Ocampo and Almeda [31]                  | KF821296 | EU055863 | KF820490 | NA       |
| <i>Ossaea micrantha</i> (Sw.) Macfad. ex Cogn.   | Ocampo and Almeda [31]                  | KF821299 | AY460539 | KF820493 | KF822484 |
| <i>Ossaea petiolaris</i> (Naudin) Triana         | Bolivia, <i>Solomon 7529</i> (NY)‡      | KF821306 | EF418914 | KF820500 | KF822491 |
| <i>Ossaea quadrisulca</i> (Naudin) Wurdack       | Ocampo and Almeda [31]                  | KF821308 | EF418915 | KF820502 | KF822493 |
| <i>Ossaea robusta</i> (Triana) Cogn.             | Ocampo and Almeda [31]                  | KF821309 | AY460538 | KF820503 | KF822494 |
| <i>Ossaea sanguinea</i> Cogn.                    | Brazil, <i>Pirani 763</i> (NY)‡         | KF821313 | EU055865 | KF820505 | NA       |
| <i>Ossaea sparrei</i> Wurdack                    | Ecuador, <i>Clemants 1694</i> (NY)‡     | KF821314 | EU055867 | KF820506 | KF822498 |
| <i>Ossaea spicata</i> Gleason                    | Ocampo and Almeda [31]                  | KF821315 | EU055868 | KF820507 | KF822499 |

|                                                      |                                                  |          |          |          |          |
|------------------------------------------------------|--------------------------------------------------|----------|----------|----------|----------|
| <i>Ossaea turquinensis</i> Urb.                      | Cuba, <i>Chrysogone 5814</i> (NY)‡               | KF821317 | NA       | KF820508 | KF822500 |
| <i>Pachyanthus angustifolius</i> Griseb.             | Cuba, <i>HFC 81592</i> (HAJB)‡                   | KF821321 | EU055870 | KF820510 | KF822504 |
| <i>Pachyanthus clementis</i> P.Wilson                | Cuba, <i>HFC 82465</i> (HAJB)‡                   | KF821323 | EU055872 | KF820512 | KF822506 |
| <i>Pachyanthus cubensis</i> A.Rich.                  | Cuba, <i>HFC 82418</i> (HAJB)‡                   | KF821324 | EU055873 | KF820513 | KF822507 |
| <i>Pachyanthus mantuensis</i> Britton & P.Wilson     | Cuba, <i>HFC 82419</i> (HAJB)‡                   | KF821327 | EU055876 | KF820516 | KF822510 |
| <i>Pachyanthus mayarensis</i> Urb.                   | Cuba, <i>HFC 82496</i> (HAJB)‡                   | KF821328 | EU055877 | KF820517 | KF822511 |
| <i>Pachyanthus moaensis</i> Borhidi                  | Cuba, <i>HFC 82504</i> (HAJB)‡                   | KF821329 | EF418918 | KF820518 | KF822512 |
| <i>Pachyanthus pedicellatus</i> Urb.                 | Cuba, <i>HFC 81126</i> (HAJB)‡                   | KF821332 | EU055881 | KF820521 | KF822515 |
| <i>Pachyanthus poiretii</i> Griseb.                  | Cuba, <i>HFC 81675</i> (HAJB)‡                   | KF821333 | EU055882 | KF820522 | KF822516 |
| <i>Pachyanthus reticulatus</i> Britton & P.Wilson    | Cuba, <i>HFC 82484</i> (HAJB)‡                   | KF821334 | EU055883 | KF820523 | KF822517 |
| <i>Pachyanthus tetramerus</i> Urb. & Ekman           | Cuba, <i>HFC 82425</i> (HAJB)‡                   | KF821335 | EU055884 | KF820524 | KF822518 |
| <i>Pachyanthus wrightii</i> Griseb.                  | Cuba, <i>HFC 82269</i> (HAJB)‡                   | KF821336 | EU055885 | KF820525 | KF822519 |
| <i>Pleiochiton ebracteatum</i> Triana                | Brazil, <i>Reginato 1238</i> (NY)‡               | KF821345 | EF418919 | NA       | NA       |
| <i>Pleiochiton roseum</i> Cogn.                      | Brazil, <i>Chiavegatto 143</i> (RB)‡             | KF821348 | NA       | NA       | NA       |
| <i>Pleiochiton setulosum</i> Cogn.                   | Brazil, <i>Reginato 1122</i> (NY)‡               | KF821349 | NA       | NA       | NA       |
| <i>Sagraea fuertesii</i> (Cogn.) Alain               | Ocampo and Almeda [31]                           | KF820656 | AY460541 | NA       | KF821856 |
| <i>Sagraea scalpta</i> (Vent.) Naudin                | Ocampo and Almeda [31]                           | KF821353 | KF821763 | KF820534 | KF822526 |
| <i>Tetrazygia barbata</i> Borhidi                    | Cuba, <i>HFC 85468</i> (HAJB)‡                   | KF821357 | NA       | KF820538 | KF822530 |
| <i>Tetrazygia bicolor</i> Cogn.                      | Cuba, <i>HFC 82286</i> (HAJB)‡                   | KF821358 | AY460543 | KF820539 | KF822531 |
| <i>Tetrazygia coriacea</i> Urb.                      | Cuba, <i>Liogier 1199</i> (NY)‡                  | KF821359 | EU055891 | KF820540 | KF822532 |
| <i>Tetrazygia crotonifolia</i> (Desr.) DC.           | Cuba, <i>Williams &amp; Whitten s.n.</i> (FLAS)‡ | KF821361 | KF821766 | KF820542 | KF822534 |
| <i>Tetrazygia discolor</i> (L.) DC.                  | Dominica, <i>Penneys 1287</i> (FLAS)‡            | KF821363 | EF418920 | KF820544 | KF822536 |
| <i>Tetrazygia elaeagnoides</i> (Sw.) DC.             | Ocampo and Almeda [31]                           | KF821365 | AY460546 | KF820546 | KF822538 |
| <i>Tetrazygia fadyenii</i> Hook.                     | Jamaica, <i>Harris 9234</i> (NY)*                | KF821367 | AY460545 | KF820548 | KF822540 |
| <i>Tetrazygia lanceolata</i> Urb.                    | Cuba, <i>HFC 82431</i> (HAJB)‡                   | KF821368 | EU055894 | KF820549 | KF822541 |
| <i>Tetrazygia longicollis</i> Urb. & Cogn.           | Dominican Republic, <i>Judd 8147</i> (NY)‡       | KF821370 | KF821769 | KF820551 | KF822543 |
| <i>Tetrazygia urbaniana</i> (Cogn.) Croizat ex Mosc. | Ocampo and Almeda [31]                           | KF821373 | EF418921 | KF820554 | KF822546 |
| <i>Tococa aristata</i> Benth.                        | Guyana, <i>Pipoly &amp; Boyan 8533</i> (CAS)*    | KF821375 | KF821773 | KF820556 | KF822548 |
| <i>Tococa caquetana</i> Sprague                      | Ocampo and Almeda [31]                           | KF821379 | AY460550 | KF820561 | KF822553 |
| <i>Tococa coronata</i> Benth.                        | Venezuela, <i>Castillo 1570</i> (CAS)*           | KF821383 | AY460552 | KF820565 | KF822557 |
| <i>Tococa guianensis</i> Aubl.                       | Brazil, <i>Rabelo et al. 3719</i> (CAS)*         | KF821385 | AY460554 | KF820567 | KF822559 |
| <i>Tococa macrophysca</i> Spruce ex Triana           | Ocampo and Almeda [31]                           | KF821386 | AY460555 | KF820568 | KF822560 |
| <i>Tococa macrosperma</i> Mart.                      | Venezuela, <i>Michelangeli 283</i> (NY)‡         | KF821387 | AY460556 | KF820569 | KF822561 |
| <i>Tococa nitens</i> (Benth.) Triana                 | Ocampo and Almeda [31]                           | KF821388 | AY460557 | KF820570 | KF822562 |
| <i>Tococa perclara</i> Wurdack                       | Ocampo and Almeda [31]                           | KF821389 | AY60558  | KF820571 | KF822563 |
| <i>Tococa platyphylla</i> Benth.                     | Ocampo and Almeda [31]                           | KF821390 | EU055896 | KF820572 | KF822564 |
| <i>Tococa quadrialata</i> (Naudin) J.F.Macbride      | Ocampo and Almeda [31]                           | KF821391 | EF418922 | KF820573 | KF822565 |
| <i>Tococa rotundifolia</i> (Triana) Wurdack          | Ocampo and Almeda [31]                           | NA       | AY460560 | KF820575 | KF822567 |
| <i>Tococa spadiciflora</i> Triana                    | Ocampo and Almeda [31]                           | KF821394 | EU055897 | NA       | KF822568 |
| <i>Tococa subciliata</i> (DC.) Triana                | Ocampo and Almeda [31]                           | KF821396 | AY460561 | KF820579 | KF822571 |
| OUTGROUP                                             |                                                  |          |          |          |          |
| <i>Adelobotrys adscendens</i> (Sw.) Triana           | Panama, <i>Penneys &amp; Blanco 1665</i> (CAS)*  | NA       | AY460446 | KF819860 | KF821780 |
| <i>Adelobotrys permixta</i> Wurdack                  | Guyana, <i>Clarke et al. 5376</i> (CAS)*         | NA       | KF821399 | KF819862 | KF821782 |
| <i>Axinaea grandifolia</i> (Naudin) Triana           | Venezuela, <i>King et al. 10459</i> (CAS)*       | KF820585 | AY460448 | KF819867 | KF821787 |
| <i>Eriocnema fulva</i> Naudin                        | Baumgratz [21]                                   | KF820735 | EF418811 | KF819990 | KF821935 |
| <i>Graffenrieda bella</i> Almeda                     | Panama, <i>Mori et al. 7581</i> (CAS)*           | NA       | EF418812 | NA       | NA       |
| <i>Graffenrieda gracilis</i> (Triana) L.O.Williams   | Bolivia, <i>Solomon 14812</i> (CAS)*             | KF820740 | KF821478 | KF819995 | KF821940 |



|                                                      |                                                  |          |          |          |          |
|------------------------------------------------------|--------------------------------------------------|----------|----------|----------|----------|
| <i>Graffenrieda intermedia</i> Triana                | Venezuela, <i>Liesner 17808</i> (CAS)*           | KF820743 | EU055684 | KF819998 | KF821943 |
| <i>Graffenrieda latifolia</i> (Naudin) Triana        | Venezuela, <i>Steyermark 120932</i> (NY)‡        | KF820744 | AY460450 | NA       | NA       |
| <i>Graffenrieda limbata</i> Triana                   | Peru, <i>Foster et al. 10579</i> (CAS)*          | KF820745 | KF821481 | KF819999 | KF821944 |
| <i>Graffenrieda miconioides</i> Naudin               | Peru, <i>Schunke 12554</i> (CAS)*                | KF820746 | KF821482 | KF820000 | KF821945 |
| <i>Graffenrieda micrantha</i> (Gleason) L.O.Williams | Panama, <i>McPherson 11228</i> (CAS)*            | KF820747 | KF821483 | KF820001 | KF821946 |
| <i>Graffenrieda moritziana</i> Triana                | Venezuela, <i>Meier 659</i> (CAS)*               | KF820749 | AY460451 | NA       | NA       |
| <i>Graffenrieda sessilifolia</i> Triana              | Venezuela, <i>Huber 10301</i> (CAS)*             | KF820750 | AY460452 | KF820003 | KF821948 |
| <i>Macrocentrum cristatum</i> (DC.) Triana           | Guyana, <i>Prevost &amp; Grenand 1056</i> (CAS)* | NA       | KF821522 | KF820086 | KF822038 |
| <i>Macrocentrum droseroides</i> Triana               | Guyana, <i>Clarke et al. 5451</i> (CAS)*         | KF820852 | KF821523 | KF820087 | KF822039 |
| <i>Macrocentrum fasciculatum</i> (DC.) Triana        | Guyana, <i>Maas &amp; Westra 4440</i> (CAS)*     | NA       | KF821524 | KF820088 | KF822040 |
| <i>Macrocentrum minus</i> Gleason                    | Guyana, <i>Henkel &amp; Williams 2158</i> (CAS)* | KF820854 | KF821526 | KF820090 | NA       |
| <i>Macrocentrum repens</i> (Gleason) Wurdack         | Guyana, <i>Muchnick et al. 114</i> (CAS)*        | KF820856 | KF821528 | KF820092 | KF822043 |
| <i>Meriania involucrata</i> (Desr.) Naudin           | NA, <i>García 971</i> (NY)‡                      | KF820880 | EF418874 | KF820116 | KF822066 |
| <i>Meriania longifolia</i> (Naudin) Cogn.            | Venezuela, <i>King et al. 10567</i> (CAS)*       | KF820882 | AY460454 | NA       | KF822068 |
| <i>Meriania macrophylla</i> (Benth.) Triana          | Panama, <i>Penneys &amp; Olmos 1741</i> (CAS)*   | KF820883 | AY460455 | KF820118 | KF822069 |
| <i>Meriania phlomoide</i> s (Triana) Almeda          | NA, <i>Rodríguez 2075</i> (NY)‡                  | KF820884 | EF418875 | NA       | KF822070 |
| <i>Meriania sclerophylla</i> (Naudin) Triana         | Guyana, <i>Pipoly 10870</i> (NY)‡                | KF820887 | AY460456 | KF820121 | KF822073 |
| <i>Meriania subumbellata</i> Cogn.                   | Venezuela, <i>Michelangeli et al. 819</i> (CAS)* | KF820889 | AY460457 | KF820122 | KF822075 |
| <i>Meriania urceolata</i> Triana                     | Venezuela, <i>Huber 9774</i> (CAS)*              | KF820891 | AY460458 | KF820124 | KF822077 |
| <i>Physeterostemon fiaschii</i> R.Goldenb. & Amorim  | Brazil, <i>Amorim 4816</i> (NY)‡                 | KF821337 | KF821758 | KF820528 | NA       |
