# Supplementary material for: Seed Diversity in the Tribe Miconieae (Melastomataceae): Taxonomic, Systematic, and Evolutionary Implications
Source: PubMed Central journal article supplement (PMC4067357; doi:10.1371/journal.pone.0100561), 2014-06-23
Supplement: pone.0100561.s004.pdf [file pone.0100561.s004.pdf]

Table S2. Morphological data matrix. Numbers correspond to characters and character states shown in the Materials and Methods section. *Notes:* \* = character with polymorphic data; ? = missing data; ‡ = species with a combination of character states that were estimated for the ancestral Miconieae seed; § = outgroup taxa.

| Species / character                 | A*  | B | C*  | D*  | E | F | G | H | I | J*  | K*  | L*  | M | N | O | P | Q |
|-------------------------------------|-----|---|-----|-----|---|---|---|---|---|-----|-----|-----|---|---|---|---|---|
| <i>Adelobotrys permixta</i> §       | 3   | 0 | 0   | 7   | 2 | 0 | 0 | 1 | 0 | 1   | 1   | 0   | 0 | 0 | 0 | 0 | 4 |
| <i>Anaetocalyx bracteosa</i>        | 0   | 0 | 0   | 0   | 2 | 0 | 0 | 1 | 0 | 1   | 1   | 0   | 0 | 0 | 0 | 0 | 1 |
| <i>Axinaea grandifolia</i> §        | 1   | 0 | 0   | 7   | 1 | 0 | 0 | 1 | 0 | 1   | 1   | 0   | 0 | 0 | 0 | 0 | 2 |
| <i>Calycogonium bissei</i>          | 0   | 0 | 0   | 0   | 2 | 0 | 1 | 1 | ? | 1   | 1   | 0   | 0 | 0 | 0 | 0 | 3 |
| <i>Calycogonium glabratum</i>       | 0   | 0 | 0   | 0   | 2 | 0 | 0 | 1 | 0 | 1   | 1   | 0   | 0 | 0 | 1 | 0 | 1 |
| <i>Calycogonium grisebachii</i>     | 0   | 0 | 1   | 5   | 2 | 0 | 1 | 1 | 0 | 1   | 1   | 0   | 0 | 0 | 0 | 0 | 3 |
| <i>Calycogonium heterophyllum</i>   | 1   | 0 | 0   | ?   | 2 | 1 | 0 | 1 | 0 | 0&1 | 1   | 1   | 0 | 0 | 0 | 0 | 1 |
| <i>Calycogonium lanceolatum</i>     | 0&1 | 0 | 0   | 1&5 | 2 | 0 | 0 | ? | 0 | 1   | 1   | 0   | 0 | 0 | 0 | 0 | 1 |
| <i>Calycogonium microphyllum</i>    | 0&1 | 0 | 0   | 0   | 2 | 0 | 0 | 0 | 0 | 1   | 1   | 0   | 0 | 0 | 0 | 0 | 1 |
| <i>Calycogonium revolutum</i>       | 0   | 0 | 0   | 0   | 1 | 0 | 1 | 1 | 1 | 0   | 1   | 0   | 1 | 0 | 0 | 0 | 3 |
| <i>Calycogonium rosmarinifolium</i> | 0   | 0 | 0   | 0   | 2 | 0 | 0 | 1 | 0 | 1   | 1   | 0   | 0 | 0 | 0 | 0 | 4 |
| <i>Charianthus alpinus</i>          | 0&1 | 0 | 0   | 0&7 | 2 | 0 | 0 | 1 | 0 | 1   | 1   | 0   | 0 | 0 | 0 | 0 | 1 |
| <i>Charianthus corymbosus</i>       | 0&1 | 0 | 0   | 5   | 2 | 0 | 1 | 1 | 0 | 1   | 1   | 0   | 0 | 0 | 0 | 0 | 1 |
| <i>Charianthus dominicensis</i>     | 0&1 | 0 | 0   | 5   | 2 | 0 | 0 | 1 | 0 | 1   | 1   | 0   | 0 | 0 | 0 | 0 | 1 |
| <i>Charianthus nodosus</i>          | 0   | 0 | 0   | 1&5 | 2 | 0 | 0 | 1 | 0 | 1   | 1   | 0   | 0 | 0 | 0 | 0 | 1 |
| <i>Charianthus purpureus</i>        | 0&1 | 0 | 0   | 5   | 2 | 0 | 0 | 1 | 0 | 1   | 1   | 0   | 0 | 0 | 0 | 0 | 1 |
| <i>Clidemia allardii</i>            | 0   | 0 | 0   | 0   | 1 | 0 | 0 | 0 | 0 | 0   | 1   | 0   | 1 | 1 | 1 | 1 | 1 |
| <i>Clidemia alternifolia</i>        | 0   | 0 | 0   | ?   | 0 | 0 | 1 | 1 | ? | ?   | 0   | ?   | 0 | 0 | 1 | 0 | 1 |
| <i>Clidemia angustilamina</i>       | 0   | 0 | 0   | ?   | 2 | 0 | 0 | 1 | 0 | 1   | 1   | 0   | 0 | 0 | 0 | 0 | 1 |
| <i>Clidemia aphanantha</i>          | 0   | 0 | 0   | 0   | 2 | 0 | 0 | 1 | 0 | 0&1 | 1   | 0   | 1 | 1 | 0 | 0 | 1 |
| <i>Clidemia capilliflora</i>        | 0&1 | 0 | 0&1 | ?   | 2 | 0 | 1 | 1 | 0 | 1   | 1   | 0   | 0 | 0 | 0 | 0 | 1 |
| <i>Clidemia capitata</i>            | 0   | 0 | 0   | 0   | 2 | 0 | 0 | 0 | 1 | 1   | 1   | 0   | 0 | 0 | 0 | 0 | 2 |
| <i>Clidemia capitellata</i>         | 0   | 0 | 1   | ?   | ? | 0 | 0 | 0 | 1 | 0   | 1   | 0   | 1 | 0 | 1 | 0 | 1 |
| <i>Clidemia caudata</i>             | 1   | 0 | 0   | 1   | 1 | 0 | 1 | 1 | 0 | 1   | 1   | 0   | 0 | 0 | 1 | 0 | 1 |
| <i>Clidemia charadrophila</i>       | 1   | 0 | 0   | 1   | 1 | 0 | 1 | 1 | 0 | 1   | 1   | 0   | 0 | 0 | 1 | 0 | 1 |
| <i>Clidemia ciliata</i>             | 0   | 0 | 0   | 0   | 2 | 0 | 0 | 0 | 0 | 1   | 1   | 0   | 0 | 1 | 0 | 0 | 1 |
| <i>Clidemia clandestina</i>         | 0   | 0 | 0   | 0   | 1 | 0 | 0 | 1 | 0 | 1   | 1   | 0   | 0 | 1 | 0 | 0 | 1 |
| <i>Clidemia conglomerata</i>        | 1   | 0 | 0   | 0   | 1 | 0 | 0 | ? | ? | 1   | 1   | 0   | 0 | 0 | 0 | ? | 1 |
| <i>Clidemia costaricensis</i>       | 0   | 0 | 0   | 3&6 | 1 | 0 | 0 | 1 | 0 | 1   | 1   | 0   | 0 | 0 | 1 | 0 | 0 |
| <i>Clidemia crenulata</i>           | 0   | 0 | 0   | 0   | 1 | 0 | 0 | 0 | 0 | 0   | 1   | 0   | 1 | 0 | 1 | 1 | 1 |
| <i>Clidemia densiflora</i>          | 1   | 0 | 0&1 | 5   | 1 | 0 | 0 | 1 | 0 | 1   | 1   | 0   | 0 | 0 | 1 | 0 | 1 |
| <i>Clidemia dentata</i>             | 0   | 0 | 0&1 | ?   | ? | 0 | 0 | 1 | 0 | 1   | 1   | 0   | 0 | 0 | ? | 0 | 0 |
| <i>Clidemia dimorphica</i>          | 0   | 0 | 0   | ?   | 0 | 0 | 0 | 1 | 0 | 1   | 1   | 0   | 0 | 0 | 1 | 0 | 0 |
| <i>Clidemia discolor</i>            | 0   | 0 | 0   | 0   | 1 | 0 | 0 | 1 | 0 | 1   | 1   | 0   | 0 | 0 | 1 | 0 | 0 |
| <i>Clidemia domingensis</i>         | 0   | 0 | 1   | 0   | 2 | 0 | 0 | 0 | 0 | 1   | 1   | 0   | 0 | 1 | 0 | 0 | 1 |
| <i>Clidemia epiphytica</i> ‡        | 0   | 0 | 0   | 0   | 1 | 0 | 0 | 1 | 0 | 1   | 1   | 0   | 0 | 0 | 0 | 0 | 0 |
| <i>Clidemia fendleri</i>            | 0   | 0 | 0   | 0   | 2 | 0 | 0 | 1 | 1 | 1   | 1   | 0   | 0 | 1 | 0 | 0 | 1 |
| <i>Clidemia folsomii</i>            | 0   | 0 | 0   | ?   | 1 | 0 | 0 | 1 | 0 | 1   | 1   | 0   | 0 | 0 | 1 | 0 | 0 |
| <i>Clidemia garciabarrigae</i>      | 0   | 0 | 0   | 0&3 | 0 | 0 | 0 | 1 | 0 | 1   | 1   | 0   | 0 | 0 | 0 | 0 | 1 |
| <i>Clidemia globuliflora</i>        | 0   | 0 | 0   | 0   | 1 | 0 | 0 | 0 | 1 | 0   | 1   | 0   | 1 | 0 | 0 | 0 | 1 |
| <i>Clidemia gracilis</i>            | 0   | 0 | 0   | 1   | 3 | 1 | 0 | 1 | 1 | 1   | 0&1 | 0   | 0 | 0 | 1 | 0 | 1 |
| <i>Clidemia heteroneura</i>         | 0   | 0 | 1   | 0   | 1 | 0 | 0 | 1 | 0 | 0&1 | 1   | 0&1 | 0 | 0 | 0 | 0 | 2 |
| <i>Clidemia heterophylla</i>        | 0   | 0 | 0   | ?   | 0 | 0 | 0 | 1 | 0 | 1   | 1   | 0   | 0 | 0 | 1 | 0 | 0 |
| <i>Clidemia hirta</i>               | 0   | 0 | 0   | ?   | 1 | 0 | 0 | 1 | 0 | 1   | 1   | 0   | 0 | 0 | 1 | 0 | 1 |
| <i>Clidemia inobsepta</i>           | 0   | 0 | 1   | 0   | 2 | 0 | 0 | 1 | 0 | 1   | 1   | 0   | 0 | 0 | 1 | 0 | 0 |
| <i>Clidemia involucrata</i>         | 1   | 0 | 0   | ?   | 2 | 0 | 1 | 1 | ? | ?   | 0   | ?   | 0 | 0 | 1 | 1 | 1 |
| <i>Clidemia monantha</i>            | 0   | 0 | 0   | 0   | 1 | 0 | 0 | 0 | 0 | 0   | 1   | 0   | 1 | 1 | 0 | 0 | 1 |

|                                    |     |   |     |     |   |   |   |   |   |     |   |     |   |   |   |   |
|------------------------------------|-----|---|-----|-----|---|---|---|---|---|-----|---|-----|---|---|---|---|
| <i>Clidemia ombrophila</i>         | 0   | 0 | 0   | 0   | 2 | 0 | 0 | 1 | 0 | 1   | 1 | 0   | 0 | 0 | 0 | 1 |
| <i>Clidemia pittieri</i>           | 0   | 0 | 0   | 0   | 2 | 0 | 0 | 0 | 0 | 1   | 1 | 0   | 0 | 0 | 1 | 0 |
| <i>Clidemia plumosa</i>            | 0   | 0 | 0   | ?   | 2 | 0 | 0 | 1 | 0 | 1   | 1 | 0   | 0 | 0 | 1 | 0 |
| <i>Clidemia pustulata</i>          | 0   | 0 | 0   | 0   | 0 | 0 | 0 | 0 | 1 | 1   | 1 | 0   | 1 | 0 | 1 | 0 |
| <i>Clidemia radicans</i>           | 0   | 0 | 0   | ?   | 3 | 1 | 0 | 1 | 0 | 1   | 1 | 0   | 0 | 0 | 1 | 0 |
| <i>Clidemia reitziana</i>          | 0   | 0 | 0   | 5   | 3 | 1 | 0 | 0 | 0 | 1   | 1 | 0   | 0 | 0 | 1 | 0 |
| <i>Clidemia rubra</i>              | 0   | 0 | 0   | 0   | 1 | 0 | 0 | 1 | 0 | 1   | 1 | 0   | 0 | 1 | 0 | 0 |
| <i>Clidemia septuplinervia</i>     | 0   | 0 | 0   | ?   | 2 | 0 | 0 | 1 | 0 | 1   | 1 | 0   | 0 | 0 | 0 | 0 |
| <i>Clidemia setosa</i>             | 0   | 0 | 1   | 0   | 1 | 0 | 0 | 1 | 0 | 1   | 1 | 0   | 0 | 0 | 0 | 0 |
| <i>Clidemia tenebrosa</i>          | 0   | 0 | 0   | 0   | 1 | 0 | 0 | 1 | 0 | 1   | 1 | 0   | 0 | 0 | 1 | 0 |
| <i>Clidemia trichosantha</i>       | 0   | 0 | 1   | ?   | ? | 0 | 1 | 1 | 0 | 0&1 | 2 | 0   | 0 | 0 | 1 | 1 |
| <i>Clidemia trinitensis</i>        | 0   | 0 | 1   | ?   | 2 | 0 | 0 | 1 | 0 | 0&1 | 1 | 0   | 1 | 1 | 0 | 0 |
| <i>Clidemia umbellata</i>          | 0   | 0 | 0   | 0   | 1 | 0 | 0 | 0 | 1 | 1   | 1 | 0   | 0 | 0 | 1 | 0 |
| <i>Clidemia umbrosa</i>            | 0   | 0 | 0&1 | 0   | 1 | 0 | 1 | 1 | 0 | 1   | 1 | 0   | 1 | 0 | 1 | 0 |
| <i>Clidemia urceolata</i>          | 0   | 0 | 0   | ?   | 1 | 0 | 0 | 1 | 1 | 0&1 | 1 | 0   | 1 | 0 | 1 | 0 |
| <i>Clidemia wrightii</i>           | 0   | 0 | 0   | ?   | 3 | 1 | 0 | 1 | ? | 1   | 1 | 0   | 0 | 0 | 0 | 1 |
| <i>Conostegia bigibbosa</i>        | 0   | 0 | 0   | 0   | 1 | 0 | 0 | 0 | 1 | 1   | 1 | 0   | 0 | 0 | 0 | 0 |
| <i>Conostegia icosandra</i>        | 0   | 0 | 0   | 0   | 2 | 0 | 0 | 0 | 0 | 1   | 1 | 0   | 0 | 1 | 0 | 0 |
| <i>Conostegia lasiopoda</i>        | 0   | 0 | 0   | 0   | 1 | 0 | 0 | 1 | 0 | 1   | 1 | 0   | 0 | 0 | 0 | 1 |
| <i>Conostegia macrantha</i>        | 0   | 0 | 0   | 0   | 1 | 0 | 0 | 0 | 1 | 1   | 1 | 0   | 0 | 0 | 0 | 1 |
| <i>Conostegia montana</i>          | 0   | 0 | 0   | ?   | 1 | 0 | 0 | 1 | 0 | 1   | 1 | 0   | 0 | 0 | 0 | 0 |
| <i>Conostegia montealegrana</i>    | 0   | 0 | 0   | ?   | ? | 0 | 0 | 1 | 0 | 0&1 | 1 | 0   | 1 | 1 | 0 | 1 |
| <i>Conostegia oerstediana</i>      | 0   | 0 | 0   | 0   | 1 | 0 | 0 | 0 | 1 | 1   | 1 | 0   | 0 | 0 | 0 | 1 |
| <i>Conostegia pittieri</i>         | 0   | 0 | 0   | 0   | 1 | 0 | 0 | 1 | 1 | 1   | 1 | 0   | 0 | 0 | 0 | 1 |
| <i>Conostegia rhodopetala</i>      | 0   | 0 | 0   | ?   | 2 | 0 | 0 | 1 | 0 | 1   | 1 | 0   | 0 | 0 | 0 | 1 |
| <i>Conostegia rufescens</i>        | 0   | 0 | 0   | ?   | 1 | 0 | 0 | 1 | 0 | 1   | 1 | 0   | 0 | 0 | 0 | 0 |
| <i>Conostegia setosa</i>           | 0   | 0 | 0   | ?   | 2 | 0 | 0 | 1 | 0 | 1   | 1 | 0   | 0 | 1 | 0 | 0 |
| <i>Conostegia speciosa</i>         | 0   | 1 | 0   | 0   | 2 | 0 | 0 | 1 | 0 | 1   | 1 | 0   | 0 | 0 | 0 | 2 |
| <i>Conostegia subcrustulata</i>    | 0   | 1 | 0   | 0   | 2 | 0 | 0 | 0 | 0 | 1   | 1 | 0   | 0 | 0 | 0 | 2 |
| <i>Conostegia superba</i>          | 0   | 0 | 0   | 0   | 2 | 0 | 0 | 1 | 0 | 1   | 1 | 0   | 0 | 0 | 0 | 0 |
| <i>Conostegia tenuifolia</i>       | 0   | 0 | 0   | ?   | 1 | 0 | 0 | ? | 0 | 1   | 1 | 0   | 0 | 0 | 0 | 0 |
| <i>Conostegia xalapensis</i>       | 0   | 1 | 0   | 1   | 2 | 0 | 0 | 0 | 0 | 1   | 1 | 0   | 0 | 0 | 0 | 1 |
| <i>Eriocnema fulva</i> §           | 0   | 0 | 0   | ?   | 0 | 0 | 0 | ? | 0 | 0   | ? | ?   | ? | 0 | ? | 1 |
| <i>Graffenrieda bella</i> §        | 0&1 | 0 | 0   | 7   | 2 | 0 | 1 | 1 | 0 | 1   | 1 | 0   | 0 | 1 | 0 | 1 |
| <i>Graffenrieda gracilis</i> §     | 1   | 0 | 0   | 7   | 2 | 0 | 1 | 1 | 0 | 1   | 1 | 0   | 0 | 1 | 0 | 0 |
| <i>Graffenrieda intermedia</i> §   | 1   | 0 | 0   | 7   | 2 | 0 | 1 | 1 | ? | 1   | 1 | 0   | 0 | 1 | 0 | 1 |
| <i>Graffenrieda latifolia</i> §    | 3   | 0 | 0   | 6   | 2 | 0 | 0 | 1 | 1 | 1   | 1 | 0   | 0 | 0 | 0 | 2 |
| <i>Graffenrieda limbata</i> §      | 3   | 0 | 0   | 7   | 2 | 0 | 0 | 1 | ? | 1   | 1 | 0   | 0 | 1 | 0 | 3 |
| <i>Graffenrieda miconioides</i> §  | 1   | 0 | 0   | 7   | 2 | 0 | 1 | 1 | 1 | 1   | 1 | 0   | 0 | 0 | 0 | 1 |
| <i>Graffenrieda micrantha</i> §    | 3   | 0 | 0   | 7   | 2 | 0 | 1 | 1 | 0 | 1   | 1 | 0   | 0 | 1 | 0 | 1 |
| <i>Graffenrieda moritziana</i> §   | 3   | 0 | 0   | 7   | 2 | 0 | 1 | 1 | ? | 1   | 1 | 0   | 0 | 0 | 0 | 3 |
| <i>Graffenrieda sessilifolia</i> § | 1   | 0 | 0   | 1   | 2 | 0 | 1 | 1 | 1 | 1   | 1 | 0   | 0 | 0 | 0 | 1 |
| <i>Leandra acutiflora</i>          | 1   | 0 | 0   | ?   | 2 | 0 | 1 | 0 | 0 | 1   | 1 | 0   | 0 | 0 | 0 | 1 |
| <i>Leandra adenothrix</i>          | 0   | 0 | 0   | 0&5 | 2 | 0 | 0 | 1 | 0 | 1   | 1 | 0   | 0 | 0 | 0 | 1 |
| <i>Leandra agrestis</i>            | 0   | 0 | 0&1 | 0   | 0 | 0 | 0 | 0 | 1 | 0   | 1 | 0   | 1 | 0 | 1 | 0 |
| <i>Leandra aristigera</i>          | 1   | 0 | 0   | ?   | 0 | 0 | 1 | 1 | 0 | 1   | ? | ?   | 1 | 0 | 0 | 1 |
| <i>Leandra australis</i>           | 0   | 0 | 0   | 5   | 2 | 0 | ? | 1 | 0 | 1   | 1 | 0   | 0 | 0 | 0 | 1 |
| <i>Leandra barbinervis</i>         | 0   | 0 | ?   | ?   | 2 | 0 | 0 | 0 | 0 | 1   | 1 | 0&1 | 0 | 0 | 0 | 2 |
| <i>Leandra carassana</i>           | 0   | 0 | 0   | 0   | 2 | 0 | 1 | 1 | 0 | 1   | 1 | 0   | 0 | 0 | 0 | 2 |

|                                    |   |   |     |     |   |   |   |   |   |     |   |   |   |   |   |   |   |
|------------------------------------|---|---|-----|-----|---|---|---|---|---|-----|---|---|---|---|---|---|---|
| <i>Leandra chaetodon</i>           | 1 | 0 | 0   | ?   | ? | 0 | 1 | 1 | 0 | 1   | 1 | 0 | 1 | 0 | 0 | 1 | 1 |
| <i>Leandra clidemioides</i>        | 1 | 0 | 0   | 5   | 1 | 0 | 1 | 1 | 0 | 1   | 1 | 0 | 0 | 0 | 0 | 0 | 1 |
| <i>Leandra coadunata</i>           | 1 | 0 | 0   | ?   | 1 | 0 | 1 | 1 | 0 | 1   | 1 | 0 | 0 | 0 | 1 | 0 | 1 |
| <i>Leandra dichotoma</i>           | 0 | 0 | 1   | 2   | 1 | 0 | 0 | 0 | 1 | 0   | 1 | 0 | 1 | 0 | 1 | 0 | 0 |
| <i>Leandra divaricata</i>          | 0 | 0 | 0   | 2   | 0 | 0 | 0 | 0 | 1 | 0   | 1 | 0 | 1 | 0 | 1 | 0 | 0 |
| <i>Leandra edentula</i>            | 1 | 0 | 0   | ?   | 1 | 0 | 1 | 1 | 0 | 1   | 1 | 0 | 0 | 0 | 0 | 0 | 1 |
| <i>Leandra fallacissima</i>        | 0 | 0 | 0&1 | 0   | 2 | 0 | 0 | 0 | 0 | 1   | 1 | 0 | 0 | 0 | 0 | 0 | 1 |
| <i>Leandra fragilis</i>            | 0 | 0 | 0   | 0&5 | 2 | 0 | 1 | 1 | 0 | 1   | 1 | 0 | 0 | 0 | 0 | 0 | 1 |
| <i>Leandra glandulifera</i>        | 0 | 0 | 0   | ?   | 0 | 0 | 1 | 1 | ? | ?   | ? | ? | ? | ? | ? | ? | 1 |
| <i>Leandra granatensis</i>         | 0 | 0 | 0&1 | 2   | 1 | 0 | 0 | 0 | 1 | 0   | 1 | 0 | 1 | 0 | 1 | 0 | 0 |
| <i>Leandra humilis</i>             | 0 | 0 | 0   | 5   | 2 | 0 | 0 | 1 | 0 | 1   | 1 | 0 | 0 | 0 | 0 | 0 | 1 |
| <i>Leandra inaequalifolia</i>      | ? | 0 | ?   | ?   | ? | 0 | ? | ? | 0 | 1   | 1 | 0 | 1 | 0 | 0 | 0 | 0 |
| <i>Leandra ionopogon</i>           | 0 | 0 | 0   | 5   | 2 | 0 | 1 | 1 | 0 | 1   | 1 | 0 | 0 | 1 | 0 | 0 | 1 |
| <i>Leandra lima</i>                | 1 | 0 | 0&1 | 5   | 1 | 0 | 1 | 1 | 0 | 1   | 1 | 0 | 0 | 0 | 0 | 0 | 1 |
| <i>Leandra longicoma</i>           | 0 | 0 | 0   | 2&3 | 1 | 0 | 0 | 0 | 1 | 0&1 | 1 | 0 | 1 | 0 | 1 | 0 | 0 |
| <i>Leandra macdanielii</i>         | 0 | 0 | 0   | 0&3 | 0 | 0 | 0 | 0 | 1 | 0   | 1 | 0 | 1 | 0 | 1 | 0 | 0 |
| <i>Leandra melanodesma</i>         | 0 | 0 | 0   | 0   | 2 | 0 | 0 | 0 | 0 | 1   | 1 | 0 | 0 | 0 | 0 | 0 | 0 |
| <i>Leandra mexicana</i>            | 0 | 0 | 0   | ?   | 0 | 0 | 0 | 0 | 1 | 0&1 | 0 | 0 | 1 | 0 | 1 | 0 | 0 |
| <i>Leandra micropetala</i>         | 0 | 0 | 0   | ?   | ? | 0 | 1 | 1 | 0 | 1   | 1 | 0 | 0 | 1 | 0 | 0 | 1 |
| <i>Leandra nanayensis</i>          | 0 | 0 | 0   | ?   | 1 | 0 | 1 | 1 | ? | ?   | ? | ? | ? | 0 | ? | ? | 1 |
| <i>Leandra nervosa</i>             | 0 | 0 | 0   | ?   | 0 | 0 | 0 | 0 | 0 | 0&1 | 1 | 0 | 0 | 0 | 0 | 0 | 0 |
| <i>Leandra purpurascens</i>        | 0 | 0 | 0   | 0&3 | 1 | 0 | 1 | 1 | 0 | 1   | 1 | 0 | 0 | 1 | 0 | 0 | 2 |
| <i>Leandra purpurea</i>            | 0 | 0 | 0   | 0   | 2 | 0 | 1 | 1 | ? | ?   | ? | ? | ? | 0 | ? | ? | 1 |
| <i>Leandra quinquedentata</i>      | 0 | 0 | 0   | 0&1 | 2 | 0 | 0 | ? | 0 | 0&1 | 1 | 1 | 0 | 0 | 0 | 0 | 2 |
| <i>Leandra regnellii</i>           | 0 | 0 | 0   | 5   | 1 | 0 | 0 | 0 | 0 | 1   | 1 | 0 | 0 | 0 | 0 | 0 | 1 |
| <i>Leandra reitzii</i>             | 0 | 0 | 0   | 0   | 2 | 0 | 0 | 0 | 1 | 0&1 | 1 | 1 | 0 | 0 | 0 | 0 | 2 |
| <i>Leandra reversa</i>             | 0 | 0 | 0   | 0&3 | 0 | 0 | 0 | 0 | 1 | 0   | 1 | 0 | 1 | 0 | 0 | 0 | 0 |
| <i>Leandra rhamifolia</i>          | 0 | 0 | 0   | 2   | 0 | 0 | 0 | 0 | 1 | 0   | 1 | 0 | 1 | 0 | 1 | 0 | 0 |
| <i>Leandra riograndensis</i>       | 0 | 0 | 0   | 0&6 | 1 | 0 | 0 | 1 | 0 | 1   | 1 | 0 | 0 | 0 | 0 | 0 | 1 |
| <i>Leandra rufescens</i>           | 0 | 0 | 0   | 0   | 2 | 0 | 1 | 1 | 0 | 1   | 1 | 0 | 0 | 1 | 1 | 1 | 1 |
| <i>Leandra salicina</i>            | 0 | 0 | 0   | ?   | 1 | 0 | 0 | 1 | 0 | 1   | 1 | 0 | 0 | 0 | 0 | 0 | 1 |
| <i>Leandra secunda</i>             | 0 | 0 | 0   | 2   | 0 | 0 | 0 | 0 | 1 | 1   | 1 | 0 | 1 | 0 | 1 | 0 | 0 |
| <i>Leandra secundiflora</i>        | 0 | 0 | 0   | ?   | 0 | 0 | 0 | 0 | 1 | 1   | 1 | 0 | 1 | 0 | 0 | 0 | 0 |
| <i>Leandra subseriata</i>          | 0 | 0 | 0   | 6   | ? | 0 | 0 | 1 | 0 | 1   | 1 | 0 | 0 | 0 | 0 | 0 | 0 |
| <i>Leandra subulata</i> ‡          | 0 | 0 | 0   | 0   | 1 | 0 | 0 | 1 | 0 | 1   | 1 | 0 | 0 | 0 | 0 | 0 | 1 |
| <i>Leandra sulfurea</i>            | 0 | 0 | 0   | 5   | 1 | 0 | 0 | 1 | 0 | 0&1 | 1 | 1 | 0 | 0 | 0 | 0 | 2 |
| <i>Leandra ulaei</i>               | 1 | 0 | 0   | 1   | 2 | 0 | 0 | ? | 0 | 1   | 1 | 0 | 0 | 0 | 0 | 0 | 1 |
| <i>Leandra xanthocoma</i>          | 0 | 0 | 0   | ?   | 2 | 0 | 0 | 1 | 0 | 1   | 1 | 0 | 0 | 0 | 1 | 0 | 1 |
| <i>Leandra xanthostachya</i>       | 0 | 0 | 0   | ?   | 2 | 0 | 0 | 1 | 0 | 1   | 1 | 0 | 0 | 1 | 0 | 0 | 1 |
| <i>Macrocentrum cristatum</i> §    | 0 | 0 | 0   | 5   | 2 | 0 | 0 | 0 | ? | ?   | ? | ? | 0 | 1 | 0 | 0 | 0 |
| <i>Macrocentrum droseroides</i> §  | 0 | 0 | 0   | 3   | 0 | 0 | 0 | 0 | 1 | 0&1 | 2 | 1 | 2 | 0 | 0 | 1 | 0 |
| <i>Macrocentrum fasciculatum</i> § | 0 | 0 | 0   | ?   | 1 | 0 | 0 | 0 | 0 | 0   | 1 | 0 | 1 | 1 | 0 | 0 | 1 |
| <i>Macrocentrum minus</i> §        | 0 | 0 | 1   | 3   | 1 | 0 | 0 | 0 | 1 | 1   | 1 | 0 | 0 | 0 | 1 | 1 | 0 |
| <i>Macrocentrum repens</i> §       | 1 | 0 | 0   | 7   | 2 | 0 | 0 | 0 | 0 | 1   | 1 | 0 | 0 | 0 | 0 | 0 | 1 |
| <i>Maieta guianensis</i>           | 1 | 0 | 0   | 6   | 1 | 0 | 0 | 1 | 0 | 1   | 1 | 0 | 0 | 0 | 1 | 1 | 1 |
| <i>Maieta poeppigii</i>            | 0 | 0 | 0   | 3   | 1 | 0 | 0 | 1 | 0 | 1   | 1 | 0 | 0 | 0 | 1 | 1 | 1 |
| <i>Mecranium haemanthum</i>        | 0 | 0 | 0   | 0   | 1 | 0 | 0 | 0 | 1 | 1   | 1 | 0 | 0 | 0 | 1 | 0 | 0 |
| <i>Mecranium multiflorum</i>       | 0 | 0 | 1   | 0   | 1 | 0 | 0 | 0 | 0 | 1   | 1 | 0 | 0 | 0 | 1 | 0 | 0 |
| <i>Mecranium ovatum</i>            | 0 | 0 | 0&1 | 0   | 1 | 0 | 0 | 1 | 1 | 1   | 1 | 0 | 1 | 0 | 1 | 0 | 1 |
| <i>Mecranium puberulum</i>         | 0 | 0 | 0   | 0   | 2 | 0 | 0 | 0 | 1 | 1   | 1 | 0 | 1 | 0 | 1 | 0 | 1 |

|                                 |     |   |     |     |   |   |   |   |   |     |   |   |   |   |   |   |   |
|---------------------------------|-----|---|-----|-----|---|---|---|---|---|-----|---|---|---|---|---|---|---|
| <i>Mecranium septentrionale</i> | 0   | 0 | 0   | 0   | 2 | 0 | 0 | 1 | 1 | 1   | 1 | 0 | 0 | 0 | 1 | 0 | 1 |
| <i>Meriania involucrata</i> §   | 1   | 0 | 0   | 7   | 0 | 0 | 0 | 1 | 0 | 1   | 1 | 0 | 0 | 0 | 0 | 0 | 2 |
| <i>Meriania longifolia</i> §    | 3   | 0 | 0   | 6   | 0 | 0 | 1 | 1 | 0 | 1   | 1 | 0 | 0 | 1 | 0 | 0 | 2 |
| <i>Meriania macrophylla</i> §   | 1&3 | 0 | 0   | 6   | 0 | 0 | 0 | 1 | 0 | 1   | 1 | 0 | 0 | 1 | 0 | 0 | 2 |
| <i>Meriania phlomoides</i> §    | 1   | 0 | 0   | ?   | 0 | 0 | 0 | 1 | 1 | 1   | 1 | 0 | 0 | 0 | 0 | 0 | 0 |
| <i>Meriania sclerophylla</i> §  | 1   | 0 | 0   | ?   | 0 | 0 | 0 | 1 | 1 | 1   | 1 | 0 | 0 | 1 | 0 | 0 | 3 |
| <i>Meriania subumbellata</i> §  | 3   | 0 | 0   | ?   | ? | 0 | 0 | 1 | 1 | 1   | 1 | 0 | 0 | 0 | 0 | 0 | 3 |
| <i>Meriania urceolata</i> §     | 3   | 0 | 0   | ?   | 0 | 0 | 0 | 1 | ? | 1   | 1 | 0 | 0 | 1 | 0 | 0 | 6 |
| <i>Miconia aeruginosa</i>       | 0   | 0 | 0&1 | 0   | 0 | 0 | 0 | 1 | 0 | 1   | 1 | 0 | 0 | 0 | 0 | 0 | 1 |
| <i>Miconia alata</i>            | 0   | 0 | 0   | 6   | 1 | 0 | 1 | 0 | 0 | 1   | 1 | 0 | 0 | 0 | 0 | 0 | 1 |
| <i>Miconia alborufescens</i>    | 0   | 0 | 1   | 0   | 2 | 0 | 0 | 0 | 0 | 1   | 1 | 0 | 2 | 0 | 0 | 0 | 2 |
| <i>Miconia aliquantula</i>      | 0   | 0 | 0   | 0&1 | 0 | 0 | 1 | 1 | 0 | 1   | 1 | 0 | 0 | 0 | 0 | 1 | 0 |
| <i>Miconia amilcariana</i>      | 0   | 0 | 1   | 0&3 | 2 | 0 | 0 | 1 | 0 | 0   | 2 | 1 | 2 | 0 | 0 | 0 | 1 |
| <i>Miconia amplinodis</i>       | 0   | 0 | 0   | 0   | 1 | 0 | 0 | 1 | 0 | 0   | 0 | ? | 0 | 0 | 1 | 0 | 1 |
| <i>Miconia appendiculata</i>    | 0   | 0 | 1   | 0   | 2 | 0 | 0 | 1 | 0 | 0&1 | 2 | 1 | 2 | 0 | ? | 0 | 4 |
| <i>Miconia arboricola</i>       | 0   | 0 | 1   | 2&3 | 1 | 0 | 0 | 1 | 0 | 1   | 1 | 0 | 0 | 0 | 0 | 0 | 1 |
| <i>Miconia argentea</i>         | 0   | 0 | 0&1 | 5   | 2 | 0 | 1 | 0 | 0 | 1   | 1 | 0 | 0 | 0 | 0 | 0 | 1 |
| <i>Miconia argyrophylla</i>     | 0   | 0 | 0   | 0   | 2 | 0 | 0 | 0 | 0 | 1   | 1 | 1 | 0 | 0 | 0 | 0 | 2 |
| <i>Miconia aspergillaris</i>    | 0   | 0 | 0&1 | ?   | ? | 0 | 0 | 1 | 0 | 1   | 1 | 0 | 0 | 0 | 0 | 0 | 1 |
| <i>Miconia astroplocama</i>     | 0   | 0 | 0   | 0&3 | 0 | 0 | 1 | 1 | 0 | 0   | 1 | 1 | 0 | 0 | 0 | 0 | 2 |
| <i>Miconia ayardii</i>          | 0   | 0 | 0   | 0   | 2 | 0 | 0 | 0 | 1 | 1   | 1 | 0 | 0 | 0 | 0 | 0 | 1 |
| <i>Miconia baracoensis</i>      | 0   | 0 | 0   | 0   | 2 | 0 | 0 | 1 | 0 | 1   | 1 | 0 | 2 | 0 | 0 | 0 | 4 |
| <i>Miconia barbeyana</i>        | 0   | 0 | 0   | ?   | 2 | 0 | 0 | 1 | 0 | 1   | 1 | 0 | 0 | 0 | 0 | 0 | 0 |
| <i>Miconia benthamiana</i>      | 0   | 0 | 0   | 0   | 1 | 0 | 0 | 1 | 0 | 1   | 1 | 0 | 0 | 0 | 0 | 1 | 0 |
| <i>Miconia biglandulosa</i>     | 1   | 0 | 0   | ?   | ? | 0 | 1 | 1 | ? | ?   | ? | ? | ? | ? | ? | ? | 1 |
| <i>Miconia biperulifera</i>     | 0   | 0 | 0   | 0   | 1 | 0 | 0 | 0 | 0 | 1   | 1 | 0 | 0 | 0 | 0 | 0 | 2 |
| <i>Miconia brachybotrya</i>     | 0   | 0 | 1   | 0   | 1 | 0 | 0 | 1 | 0 | 0   | 1 | 0 | 0 | 0 | 0 | 0 | 1 |
| <i>Miconia bracteata</i>        | 0   | 0 | 0   | 0   | 0 | 0 | 0 | 1 | ? | ?   | ? | ? | ? | 0 | ? | ? | 0 |
| <i>Miconia bracteolata</i>      | 0   | 0 | 0   | 0   | 1 | 0 | 0 | 0 | 0 | 0   | 1 | 0 | 0 | 0 | 0 | 0 | 1 |
| <i>Miconia brasiliensis</i>     | 0   | 0 | 1   | 3   | 2 | 0 | 0 | 0 | 0 | 1   | 1 | 0 | 2 | 0 | 1 | 0 | 4 |
| <i>Miconia breneisii</i>        | 0&1 | 0 | 0   | 0&1 | 0 | 0 | 1 | 0 | 0 | 1   | 0 | 0 | 0 | 0 | 1 | 0 | 0 |
| <i>Miconia brevitheca</i>       | 0   | 0 | 0   | 0   | 1 | 0 | 0 | 0 | 0 | 1   | 1 | 0 | 1 | 0 | 0 | 0 | 0 |
| <i>Miconia brunnea</i>          | 0   | 0 | 1   | 0&2 | 2 | 0 | 0 | 0 | 0 | 1   | 1 | 0 | 2 | 0 | 0 | 0 | 7 |
| <i>Miconia bubalina</i>         | 0   | 0 | 0   | 0&3 | 1 | 0 | 0 | 1 | 0 | 1   | 1 | 0 | 0 | 0 | 1 | 0 | 1 |
| <i>Miconia buddlejoides</i>     | 0   | 0 | 1   | ?   | ? | 0 | 0 | 0 | 0 | 1   | 1 | 0 | 0 | 0 | 0 | 0 | 4 |
| <i>Miconia bullata</i>          | 0   | 0 | 0   | 0   | 1 | 0 | 0 | 0 | 0 | 1   | 1 | 0 | 0 | 0 | 0 | 0 | 1 |
| <i>Miconia cabucu</i>           | 0   | 0 | 0&1 | 0   | 2 | 0 | 0 | 0 | 0 | 1   | 1 | 0 | 0 | 0 | 1 | 0 | 4 |
| <i>Miconia calvescens</i>       | 0   | 0 | 0   | 3   | 1 | 1 | 0 | 1 | 0 | 1   | 1 | 0 | 0 | 0 | 0 | 0 | 1 |
| <i>Miconia calycina</i>         | 0   | 0 | 0   | 0&1 | 1 | 0 | 0 | 0 | 0 | 1   | 1 | 0 | 0 | 0 | 0 | 0 | 1 |
| <i>Miconia campestris</i>       | 0   | 0 | 0   | 0&3 | 0 | 0 | 0 | 0 | 0 | 0   | 1 | 0 | 1 | 0 | 1 | 0 | 1 |
| <i>Miconia caudigera</i>        | 0   | 0 | 1   | 0   | 2 | 0 | 0 | 0 | 0 | 1   | 1 | 0 | 0 | 0 | 0 | 0 | 4 |
| <i>Miconia cerasiflora</i>      | 0   | 0 | 0&1 | 5   | 1 | 0 | 0 | 0 | 0 | 1   | 1 | 0 | 0 | 0 | 0 | 0 | 6 |
| <i>Miconia cercophora</i>       | 1   | 0 | 0   | 1   | 1 | 0 | 0 | 1 | 0 | 1   | 1 | 0 | 0 | 0 | 1 | 0 | 1 |
| <i>Miconia chamissois</i> ‡     | 0   | 0 | 0   | 0   | 1 | 0 | 0 | 1 | 0 | 1   | 1 | 0 | 0 | 0 | 0 | 0 | 1 |
| <i>Miconia chartacea</i>        | 2   | 0 | 1   | 2   | 0 | 0 | 0 | 0 | 0 | 1   | 1 | 0 | 0 | 0 | 0 | 0 | 6 |
| <i>Miconia chrysophylla</i>     | 0   | 0 | 1   | 0   | 1 | 0 | 0 | 0 | 0 | 1   | 1 | 0 | 0 | 0 | 1 | 0 | 5 |
| <i>Miconia ciliata</i>          | 0   | 0 | 1   | ?   | 2 | 0 | 0 | 1 | 0 | 1   | 1 | 0 | 0 | 0 | 1 | 0 | 0 |
| <i>Miconia cinerascens</i>      | 0   | 0 | 1   | 0   | 1 | 0 | 0 | 0 | 0 | 1   | 1 | 0 | 2 | 0 | 1 | 0 | 2 |
| <i>Miconia cinnamomifolia</i>   | 0&1 | 0 | 0&1 | ?   | 2 | 0 | 0 | 0 | 0 | 1   | 1 | 0 | 0 | 0 | 0 | 0 | 2 |
| <i>Miconia collatata</i>        | 0   | 0 | 1   | 0   | 2 | 0 | 0 | 0 | 0 | 1   | 1 | 0 | 2 | 0 | 0 | 0 | 5 |

|                                |     |   |     |     |   |   |   |   |   |     |   |     |   |   |   |   |   |
|--------------------------------|-----|---|-----|-----|---|---|---|---|---|-----|---|-----|---|---|---|---|---|
| <i>Miconia concinna</i>        | 0   | 0 | 0   | 0   | 1 | 0 | 0 | 0 | 0 | 1   | 1 | 0   | 0 | 0 | 0 | 0 | 1 |
| <i>Miconia corymbiformis</i>   | 0   | 0 | 0   | 3   | 2 | 0 | 0 | 1 | ? | ?   | ? | ?   | ? | 0 | 1 | ? | 1 |
| <i>Miconia costaricensis</i>   | 0   | 0 | 0   | 0   | 1 | 0 | 0 | 0 | 0 | 1   | 1 | 0   | 0 | 0 | 0 | 0 | 1 |
| <i>Miconia crocata</i>         | 0   | 0 | 0   | 0   | 2 | 0 | 0 | ? | ? | ?   | ? | ?   | ? | ? | ? | ? | 0 |
| <i>Miconia crocea</i>          | 0   | 0 | 0   | 0   | 1 | 0 | 0 | 0 | 0 | 0   | 2 | 1   | 2 | 0 | 0 | 0 | 1 |
| <i>Miconia cubatanensis</i>    | 0   | 0 | 1   | ?   | ? | 0 | 0 | 0 | 0 | 0&1 | 1 | 0   | 2 | 0 | 1 | 0 | 4 |
| <i>Miconia cubensis</i>        | 0   | 0 | 0   | 0   | 1 | 0 | 0 | 1 | 1 | 1   | 1 | 0   | 0 | 0 | 0 | 0 | 1 |
| <i>Miconia dapsiliflora</i>    | 0   | 0 | ?   | 0   | 2 | 0 | 0 | 1 | 0 | 1   | 1 | 0   | 0 | 0 | 0 | 0 | 1 |
| <i>Miconia delicatula</i>      | 0   | 0 | 0   | 1   | 2 | 0 | 0 | 0 | 0 | 0&1 | 1 | 0&1 | 2 | 0 | 1 | 0 | 3 |
| <i>Miconia denticulata</i> ‡   | 0   | 0 | 0   | 0   | 1 | 0 | 0 | 1 | 0 | 1   | 1 | 0   | 0 | 0 | 0 | 0 | 0 |
| <i>Miconia desportesii</i>     | 0   | 0 | 0   | 0   | 2 | 0 | 0 | 0 | 0 | 1   | 1 | 0   | 0 | 0 | 0 | 0 | 1 |
| <i>Miconia dielsiana</i>       | 0   | 0 | 0   | 0&5 | 1 | 0 | 1 | 0 | 1 | 1   | 1 | 0&1 | 0 | 0 | 0 | 0 | 1 |
| <i>Miconia discolor</i>        | 0   | 0 | 0&1 | ?   | 1 | 0 | 0 | 0 | 0 | 1   | 1 | 0   | 0 | 0 | 0 | 0 | 3 |
| <i>Miconia dispar</i>          | 0&1 | 0 | 0   | 0&1 | 1 | 0 | 1 | 0 | 0 | 1   | 1 | 0   | 0 | 0 | 0 | 0 | 2 |
| <i>Miconia dissita</i>         | 0   | 0 | 0&1 | 0   | 2 | 0 | 0 | 1 | ? | ?   | ? | ?   | ? | ? | ? | ? | 0 |
| <i>Miconia dodecandra</i>      | 1   | 0 | 0   | 0   | 1 | 0 | 0 | 1 | 0 | 1   | 1 | 0   | 0 | 0 | 1 | 0 | 2 |
| <i>Miconia dolichopoda</i>     | 0   | 0 | 0   | 0   | 1 | 0 | 0 | 0 | 0 | 1   | 1 | 0   | 0 | 0 | 0 | 0 | 2 |
| <i>Miconia dolichorrhyncha</i> | 0   | 0 | 0   | 0   | 2 | 0 | 0 | 0 | 0 | 1   | 1 | 0   | 2 | 0 | 1 | 0 | 2 |
| <i>Miconia doriana</i>         | 0   | 0 | 1   | 0   | 1 | 0 | 0 | 0 | 0 | 0&1 | 1 | 0   | 0 | 0 | 1 | 0 | 4 |
| <i>Miconia duckei</i>          | 0   | 0 | 0   | 0&3 | 1 | 0 | 1 | 0 | 0 | 1   | 1 | 0   | 0 | 0 | 0 | 1 | 0 |
| <i>Miconia elvirae</i>         | 0   | 0 | 0   | 0   | 0 | 0 | 0 | ? | ? | ?   | ? | ?   | ? | ? | ? | ? | 1 |
| <i>Miconia ernstii</i>         | 0   | 0 | 1   | 0   | 0 | 0 | 0 | 1 | 0 | 1   | 1 | 0&1 | 0 | 0 | 0 | 0 | 3 |
| <i>Miconia fasciculata</i>     | 0   | 0 | 1   | ?   | 2 | 0 | 0 | 0 | 0 | 0&1 | 1 | 0   | 0 | 0 | 0 | 0 | 2 |
| <i>Miconia ferruginea</i>      | 0   | 0 | 0   | 0   | 1 | 0 | 0 | 0 | 0 | 1   | 1 | 0&1 | 0 | 0 | 0 | 0 | 1 |
| <i>Miconia floribunda</i>      | 0   | 0 | 1   | ?   | ? | 0 | 0 | 0 | 0 | 0&1 | 1 | 0&1 | 0 | 0 | 0 | 0 | 1 |
| <i>Miconia foveolata</i>       | 0   | 0 | 0   | 0   | 2 | 0 | 0 | 1 | 0 | 1   | 1 | 0   | 0 | 0 | 0 | 0 | 1 |
| <i>Miconia friedmaniorum</i>   | 0&1 | 0 | 0   | 0&1 | 1 | 0 | 1 | 0 | 0 | 1   | 2 | 0   | 2 | 0 | 0 | 0 | 1 |
| <i>Miconia furfuracea</i>      | 1   | 0 | 0   | 3&5 | 1 | 0 | 0 | 1 | 0 | 1   | 1 | 0&1 | 0 | 0 | 0 | 0 | 2 |
| <i>Miconia glandulifera</i>    | 0&1 | 0 | 0   | 0   | 0 | 0 | 0 | 1 | 0 | 1   | 1 | 0   | 0 | 0 | 0 | 0 | 1 |
| <i>Miconia goniostigma</i>     | 0   | 0 | 0   | 0&5 | 2 | 0 | 0 | 1 | 0 | 1   | 1 | 0   | 0 | 0 | 0 | 0 | 1 |
| <i>Miconia gratissima</i>      | 0   | 0 | 0   | 1&5 | 1 | 0 | 1 | 1 | 0 | 1   | 2 | 0   | 0 | 0 | 0 | 0 | 2 |
| <i>Miconia hemenostigma</i>    | 0   | 0 | 0   | 0   | 1 | 0 | 0 | 0 | 0 | 1   | 1 | 0   | 0 | 0 | 0 | 0 | 1 |
| <i>Miconia holosericea</i>     | 0   | 0 | 0   | 2&3 | 1 | 0 | 0 | 1 | 0 | 1   | 1 | 0   | 0 | 0 | 0 | 0 | 2 |
| <i>Miconia hookeriana</i>      | 0   | 0 | 0&1 | 0&3 | 2 | 0 | 0 | 1 | 0 | 1   | 1 | 0   | 0 | 0 | 0 | 0 | 1 |
| <i>Miconia hyemalis</i>        | 0   | 0 | 1   | 0   | 1 | 0 | 0 | 0 | 0 | 1   | 1 | 0   | 2 | 0 | 0 | 0 | 4 |
| <i>Miconia hypoleuca</i>       | 1   | 0 | 0   | 1   | 2 | 0 | 0 | 1 | 0 | 1   | 1 | 0   | 2 | 0 | 0 | 0 | 1 |
| <i>Miconia ibaguensis</i>      | 1   | 0 | 0   | 0&5 | 2 | 0 | 0 | 1 | 0 | 1   | 1 | 0   | 0 | 0 | 0 | 0 | 1 |
| <i>Miconia impetioilaris</i>   | 1   | 0 | 1   | ?   | 2 | 0 | 0 | 1 | 0 | 1   | 1 | 0   | 0 | 0 | 0 | 0 | 2 |
| <i>Miconia inconspicua</i>     | 0   | 0 | 1   | 0   | 2 | 0 | 0 | 0 | 0 | 0   | 1 | 1   | 1 | 1 | 0 | 0 | 2 |
| <i>Miconia jahmii</i>          | 0   | 0 | 0   | 0   | 1 | 0 | 0 | 0 | 0 | 1   | 1 | 0   | 0 | 0 | 0 | 0 | 1 |
| <i>Miconia jucunda</i>         | 0   | 0 | 0   | 0   | 2 | 0 | 1 | 0 | 0 | 1   | 1 | 0   | 0 | 0 | 0 | 0 | 2 |
| <i>Miconia krugii</i>          | 0   | 0 | 0   | 3   | 1 | 0 | 0 | 0 | 0 | 1   | 1 | 0   | 0 | 0 | 0 | 0 | 1 |
| <i>Miconia lacera</i>          | 0   | 0 | 1   | 3&6 | 1 | 1 | 0 | 1 | 0 | 1   | 1 | 0   | 0 | 0 | 1 | 0 | 0 |
| <i>Miconia laevigata</i>       | 0   | 0 | 0   | 3   | 1 | 0 | 0 | 1 | 0 | 1   | 1 | 0   | 0 | 0 | 0 | 0 | 1 |
| <i>Miconia lanceolata</i>      | 0   | 0 | 0   | 0   | 1 | 0 | 0 | 0 | 1 | 1   | 1 | 0   | 2 | 0 | 1 | 0 | 2 |
| <i>Miconia latecrenata</i>     | 0   | 0 | 1   | 0   | 2 | 0 | 0 | 0 | 0 | 1   | 1 | 0   | 0 | 0 | 0 | 0 | 1 |
| <i>Miconia latifolia</i>       | 0   | 0 | 0   | 0   | 1 | 0 | 0 | 1 | 1 | 0   | 1 | 0   | 0 | 0 | 0 | 0 | 1 |
| <i>Miconia leiotricha</i>      | 0   | 0 | 0   | 0   | 1 | 1 | 0 | 0 | 0 | 1   | 1 | 0&1 | 2 | 0 | 0 | 0 | 1 |
| <i>Miconia lepidota</i>        | 0   | 0 | 1   | 0   | 2 | 0 | 0 | 1 | 0 | 0   | 1 | 0&1 | 0 | 1 | 0 | 0 | 2 |
| <i>Miconia ligulata</i>        | 0   | 0 | 0   | 0   | 1 | 0 | 1 | 0 | 0 | 1   | 1 | 0   | 0 | 0 | 1 | 1 | 0 |
| <i>Miconia ligustrina</i>      | 0   | 0 | 0   | 0   | 1 | 1 | 0 | 0 | 0 | 1   | 1 | 0&1 | 2 | 0 | 0 | 0 | 2 |

|                                         |     |   |     |     |   |   |   |   |   |     |   |     |   |   |   |   |   |
|-----------------------------------------|-----|---|-----|-----|---|---|---|---|---|-----|---|-----|---|---|---|---|---|
| <i>Miconia ligustroides</i>             | 0   | 0 | 0&1 | ?   | 2 | 0 | 0 | 0 | 0 | 1   | 1 | 0   | 0 | 0 | 1 | 0 | 2 |
| <i>Miconia livida</i>                   | 0   | 0 | 0   | 0   | 2 | 1 | 0 | 0 | 0 | 1   | 1 | 0   | 0 | 0 | 0 | 0 | 1 |
| <i>Miconia longicuspis</i>              | 0   | 0 | 1   | 0   | 2 | 0 | 0 | 0 | 0 | 0   | 1 | 0   | 0 | 0 | 0 | 0 | 6 |
| <i>Miconia longifolia</i>               | 0   | 1 | 0&1 | ?   | 2 | 0 | 0 | 0 | 0 | 1   | 1 | 0   | 0 | 0 | 0 | 0 | 3 |
| <i>Miconia longispicata</i>             | 0   | 0 | 0   | 0   | 2 | 0 | 0 | 0 | 0 | 0   | 1 | 0   | 0 | 0 | 0 | 0 | 2 |
| <i>Miconia loreyoides</i>               | 0   | 0 | 0   | 0   | 2 | 0 | 0 | 1 | 0 | 1   | 1 | 0   | 0 | 0 | 1 | 0 | 1 |
| <i>Miconia luteola</i>                  | 0   | 0 | 0   | 0   | 1 | 0 | 0 | 0 | 0 | 1   | 1 | 0   | 0 | 0 | 0 | 0 | 2 |
| <i>Miconia lymanii</i>                  | 0   | 0 | 1   | 0   | 1 | 0 | 0 | 0 | 0 | 1   | 1 | 0   | 2 | 0 | 0 | 0 | 4 |
| <i>Miconia magdalenae</i>               | 0   | 0 | 1   | 0   | 1 | 0 | 1 | 1 | 0 | 1   | 1 | 0   | 0 | 0 | 1 | 0 | 1 |
| <i>Miconia manicata</i>                 | 0   | 0 | 0   | 0   | 2 | 0 | 0 | 0 | 0 | 1   | 1 | 0   | 0 | 0 | 1 | 0 | 1 |
| <i>Miconia marginata</i>                | 0   | 0 | 0&1 | 0   | 1 | 0 | 0 | 0 | 0 | ?   | 0 | ?   | 0 | 0 | 1 | 1 | 0 |
| <i>Miconia melanotricha</i>             | 0   | 0 | 1   | 0&6 | 1 | 0 | 0 | 1 | 0 | 1   | 2 | 0   | 2 | 0 | 0 | 0 | 1 |
| <i>Miconia melinonis</i>                | 1   | 0 | 0   | 1   | 2 | 0 | 0 | 1 | 0 | 1   | 1 | 0   | 0 | 0 | 0 | 0 | 4 |
| <i>Miconia minutiflora</i>              | 0&1 | 0 | 1   | ?   | 2 | 0 | 0 | 1 | 0 | 1   | 1 | 0   | 0 | 0 | 0 | 0 | 1 |
| <i>Miconia mirabilis</i>                | 1   | 0 | 0   | 1   | 2 | 0 | 0 | 1 | 0 | 1   | 0 | 0   | 0 | 0 | 1 | 0 | 2 |
| <i>Miconia molybdea</i>                 | 0   | 0 | 0   | 3&6 | 1 | 0 | 0 | 1 | 0 | 1   | 1 | 0   | 0 | 0 | 0 | 0 | 1 |
| <i>Miconia multispicata</i>             | 1   | 0 | 0   | 0&5 | 1 | 0 | 0 | 0 | 0 | 1   | 1 | 0   | 0 | 0 | 0 | 0 | 3 |
| <i>Miconia nitidissima</i>              | 0   | 0 | 0   | 0   | 2 | 0 | 1 | 0 | 0 | 1   | 1 | 0   | 0 | 0 | 0 | 0 | 2 |
| <i>Miconia nystroemii</i>               | 0   | 0 | 0   | 0   | 1 | 0 | 0 | 1 | 0 | 1   | 1 | 0&1 | 0 | 0 | 0 | 0 | 1 |
| <i>Miconia octopetala</i>               | 0   | 0 | 0   | 0   | 1 | 0 | 0 | 0 | 0 | 1   | 1 | 0   | 0 | 0 | 0 | 0 | 5 |
| <i>Miconia oldemanii</i>                | 1   | 0 | 0   | 0&3 | 1 | 0 | 0 | 1 | 0 | 1   | 1 | 0   | 0 | 0 | 0 | 0 | 1 |
| <i>Miconia pachyphylla</i>              | 0   | 0 | 0   | 0   | 1 | 0 | 1 | 0 | 0 | 1   | 1 | 0   | 0 | 0 | 0 | 0 | 3 |
| <i>Miconia papillosa</i>                | 0   | 0 | 0   | 3   | 1 | 0 | 0 | 0 | 0 | 1   | 1 | 0   | 0 | 0 | 0 | 0 | 1 |
| <i>Miconia pepericarpa</i>              | 0   | 0 | 1   | ?   | ? | 0 | 0 | 0 | 0 | 1   | 1 | 0   | 0 | 0 | 1 | 0 | 3 |
| <i>Miconia phanerostila</i>             | 0   | 0 | 0   | 0   | 1 | 0 | 0 | 1 | 0 | 1   | 1 | 0   | 2 | 0 | 0 | 0 | 5 |
| <i>Miconia plumosa</i>                  | 0   | 0 | 0   | 0&5 | 2 | 0 | 0 | 0 | 0 | 0   | 1 | 1   | 0 | 0 | 1 | 0 | 1 |
| <i>Miconia poeppigii</i>                | 1   | 0 | 0   | 1   | 2 | 0 | 1 | 1 | 0 | 1   | 1 | 0&1 | 0 | 0 | 0 | 0 | 2 |
| <i>Miconia polyandra</i>                | 0   | 0 | 0   | 0   | 1 | 0 | 0 | 0 | 0 | 1   | 1 | 0   | 0 | 0 | 0 | 0 | 2 |
| <i>Miconia polygama</i> <sup>‡</sup>    | 0   | 0 | 0   | 0   | 1 | 0 | 0 | 1 | 0 | 1   | 1 | 0   | 0 | 0 | 0 | 0 | 1 |
| <i>Miconia prasina</i>                  | 1   | 0 | 0   | 1   | 1 | 0 | 1 | 1 | 0 | 1   | 1 | 0   | 0 | 0 | 0 | 0 | 2 |
| <i>Miconia procumbens</i>               | 0   | 0 | 0   | 0   | 0 | 0 | 1 | 1 | 0 | 1   | 1 | 0   | 2 | 0 | 1 | 1 | 1 |
| <i>Miconia pseudoaplostachya</i>        | 1   | 0 | 0   | 1   | 2 | 0 | 0 | 0 | ? | ?   | ? | ?   | ? | ? | ? | ? | 1 |
| <i>Miconia pubipetala</i>               | 1   | 0 | 0   | 1   | 1 | 0 | 0 | 1 | 0 | 1   | 1 | 0   | 0 | 0 | 1 | 0 | 2 |
| <i>Miconia pulvinata</i>                | 0   | 0 | 0   | 3&6 | 1 | 0 | 0 | 1 | 0 | 1   | 1 | 0   | 0 | 0 | 1 | 0 | 2 |
| <i>Miconia punctata</i>                 | 0   | 0 | 1   | 0   | 2 | 0 | 0 | 0 | 0 | 1   | 1 | 0   | 2 | 0 | 1 | 0 | 5 |
| <i>Miconia pusilliflora</i>             | 0   | 0 | 0   | 0   | 2 | 0 | 0 | 0 | 0 | 1   | 1 | 0   | 2 | 0 | 0 | 0 | 4 |
| <i>Miconia pyramidalis</i> <sup>‡</sup> | 0   | 0 | 0   | 0   | 1 | 0 | 0 | 1 | 0 | 1   | 1 | 0   | 0 | 0 | 0 | 0 | 1 |
| <i>Miconia racemosa</i>                 | 0   | 0 | 1   | 0&5 | 1 | 0 | 0 | 1 | 0 | 0&1 | 1 | 0   | 0 | 0 | 1 | 0 | 0 |
| <i>Miconia ramboi</i>                   | 0   | 0 | 0   | 0   | 2 | 0 | 0 | 0 | 0 | 1   | 1 | 0   | 2 | 0 | 1 | 0 | 2 |
| <i>Miconia reducens</i>                 | 0   | 0 | 0   | 0   | 1 | 0 | 0 | 1 | 0 | 1   | 1 | 0   | 0 | 0 | 1 | 0 | 1 |
| <i>Miconia rigidiuscula</i>             | 0   | 0 | 0   | 0   | 2 | 0 | 0 | 1 | 0 | 1   | 1 | 0   | 0 | 0 | 0 | 0 | 2 |
| <i>Miconia rimalis</i>                  | 0   | 0 | 1   | 0   | 1 | 0 | 0 | 1 | 0 | 1   | 2 | 0   | 2 | 0 | 0 | 0 | 3 |
| <i>Miconia robinsoniana</i>             | 0   | 0 | 0&1 | 0   | 1 | 0 | 0 | 1 | 0 | 1   | 1 | 0&1 | 0 | 0 | 1 | 0 | 1 |
| <i>Miconia rosea</i>                    | 0   | 0 | 0   | 6   | 0 | 1 | 0 | 1 | 0 | 1   | 1 | 0   | 0 | 0 | 0 | 0 | 1 |
| <i>Miconia rubiginosa</i>               | 0   | 0 | 0   | 0   | 2 | 0 | 0 | 0 | 0 | 1   | 1 | 0   | 0 | 0 | 0 | 0 | 2 |
| <i>Miconia rufescens</i>                | 0   | 0 | 0   | 0&5 | 2 | 0 | 0 | 0 | 0 | 1   | 1 | 0   | 0 | 0 | 0 | 0 | 1 |
| <i>Miconia salicifolia</i>              | 0   | 0 | 0   | ?   | ? | 0 | 0 | 1 | 0 | 1   | 1 | 0&1 | 0 | 0 | 0 | 0 | 1 |
| <i>Miconia samanensis</i>               | 0   | 0 | 0   | 0   | 1 | 0 | 0 | 1 | 0 | 0   | 1 | 1   | 0 | 0 | 0 | 0 | 1 |
| <i>Miconia sanctiphilippi</i>           | 1   | 0 | 0   | 3&5 | 2 | 1 | 0 | 1 | 0 | 1   | 1 | 0   | 0 | 0 | 0 | 0 | 1 |
| <i>Miconia schlechtendalii</i>          | 0   | 0 | 0   | 0   | 2 | 0 | 0 | 1 | 0 | 1   | 1 | 0   | 0 | 0 | 0 | 0 | 1 |
| <i>Miconia schlimii</i>                 | 0   | 0 | 0   | 5   | 2 | 0 | 0 | 1 | 0 | 1   | 1 | 0   | 0 | 0 | 0 | 0 | 1 |

|                                 |     |   |     |     |   |   |   |   |   |     |   |     |   |   |   |   |   |
|---------------------------------|-----|---|-----|-----|---|---|---|---|---|-----|---|-----|---|---|---|---|---|
| <i>Miconia schnellii</i>        | 0   | 0 | 0   | 0   | 2 | 0 | 0 | 0 | 0 | 1   | 1 | 0   | 0 | 0 | 0 | 0 | 1 |
| <i>Miconia sclerophylla</i>     | 0   | 0 | 1   | 2   | 2 | 0 | 0 | 0 | 0 | 1   | 1 | 0   | 2 | 0 | 0 | 0 | 3 |
| <i>Miconia selleana</i>         | 0   | 0 | 0   | 5   | 2 | 0 | 0 | 0 | 0 | 1   | 1 | 1   | 0 | 0 | 0 | 0 | 1 |
| <i>Miconia sellowiana</i>       | 0   | 0 | 0   | 0   | 2 | 0 | 0 | 1 | 0 | 1   | 2 | 0   | 2 | 0 | 0 | 0 | 3 |
| <i>Miconia septentrionalis</i>  | 0   | 0 | 0   | 0&5 | 1 | 0 | 0 | 1 | 0 | 1   | 1 | 0   | 0 | 0 | 0 | 0 | 1 |
| <i>Miconia serrulata</i> †      | 0   | 0 | 0   | 0   | 1 | 0 | 0 | 1 | 0 | 1   | 1 | 0   | 0 | 0 | 0 | 0 | 1 |
| <i>Miconia sessilifolia</i>     | 0   | 0 | 0&1 | 0&3 | 2 | 0 | 0 | 0 | 1 | 1   | 1 | 0   | 1 | 0 | 1 | 0 | 1 |
| <i>Miconia simplex</i>          | 0   | 0 | 0   | 0   | 2 | 0 | 0 | 1 | 0 | 1   | 1 | 0   | 0 | 0 | 0 | 0 | 2 |
| <i>Miconia sintenisii</i>       | 0   | 0 | 0   | 0   | 1 | 0 | 0 | 0 | 1 | 1   | 1 | 0   | 0 | 0 | 0 | 0 | 1 |
| <i>Miconia skeaniana</i> †      | 0   | 0 | 0   | 0   | 1 | 0 | 0 | 1 | 0 | 1   | 1 | 0   | 0 | 0 | 0 | 0 | 1 |
| <i>Miconia smaragdina</i>       | 1   | 0 | 0   | 1   | 1 | 0 | 0 | 1 | 0 | 1   | 1 | 0   | 0 | 0 | 1 | 0 | 1 |
| <i>Miconia sphagnicola</i>      | 0   | 0 | 0   | 0   | 1 | 0 | 0 | 1 | 1 | 0   | 1 | 1   | 0 | 0 | 0 | 0 | 1 |
| <i>Miconia spinulosa</i>        | 0   | 0 | 1   | ?   | ? | 0 | 0 | 0 | 0 | 1   | 1 | 0   | 0 | 0 | 1 | 0 | 0 |
| <i>Miconia splendens</i>        | 0   | 0 | 0   | 0&1 | 2 | 0 | 0 | 0 | 0 | 1   | 1 | 0   | 2 | 0 | 0 | 0 | 2 |
| <i>Miconia stenobotrys</i>      | 0   | 0 | 0&1 | 5   | 1 | 0 | 0 | 1 | 0 | 1   | 1 | 0&1 | 0 | 0 | 0 | 1 | 2 |
| <i>Miconia stenostachya</i>     | 0&1 | 0 | 0&1 | 0&5 | 2 | 0 | 0 | 0 | 0 | 1   | 1 | 0   | 0 | 0 | 0 | 0 | 2 |
| <i>Miconia striata</i>          | 0   | 0 | 0   | 0&5 | 2 | 0 | 0 | 1 | 0 | 1   | 1 | 0   | 0 | 0 | 0 | 0 | 1 |
| <i>Miconia subcompressa</i>     | 0   | 0 | 0   | 0   | 2 | 0 | 0 | 0 | 0 | 1   | 1 | 0   | 0 | 0 | 0 | 0 | 1 |
| <i>Miconia superba</i>          | 0   | 0 | 0   | 0   | 1 | 0 | 1 | 1 | 0 | 1   | 1 | 0   | 0 | 1 | 0 | 0 | 2 |
| <i>Miconia sylvatica</i> †      | 0   | 0 | 0   | 0   | 1 | 0 | 0 | 1 | 0 | 1   | 1 | 0   | 0 | 0 | 0 | 0 | 1 |
| <i>Miconia tetrandra</i>        | 0   | 0 | 0   | 0   | 1 | 0 | 1 | 1 | 0 | 1   | 1 | 0   | 0 | 0 | 1 | 0 | 3 |
| <i>Miconia tetrastoma</i>       | 0   | 0 | 1   | 0   | 1 | 0 | 0 | 1 | 0 | 1   | 1 | 0   | 1 | 0 | 0 | 0 | 1 |
| <i>Miconia thomasiana</i>       | 0   | 0 | 0   | 0&1 | 2 | 0 | 1 | 0 | 0 | 1   | 1 | 0   | 0 | 0 | 1 | 0 | 3 |
| <i>Miconia tomentosa</i>        | 1   | 0 | 0&1 | 5   | 1 | 0 | 0 | 1 | 0 | 1   | 1 | 0&1 | 0 | 1 | 0 | 0 | 2 |
| <i>Miconia trianae</i>          | 0   | 0 | 0   | 0   | 2 | 0 | 0 | 0 | 0 | 1   | 1 | 0   | 2 | 0 | 0 | 0 | 2 |
| <i>Miconia triangularis</i> †   | 0   | 0 | 0   | 0   | 1 | 0 | 0 | 1 | 0 | 1   | 1 | 0   | 0 | 0 | 0 | 0 | 1 |
| <i>Miconia trimera</i>          | 0   | 0 | 1   | 0&3 | 2 | 0 | 1 | 1 | 0 | 1   | 1 | 0   | 0 | 0 | 1 | 1 | 0 |
| <i>Miconia triplinervis</i>     | 0   | 0 | 0   | 3&6 | 0 | 0 | 0 | 1 | 0 | 1   | 1 | 0   | 0 | 0 | 1 | 0 | 0 |
| <i>Miconia tristis</i>          | 0   | 0 | 0&1 | ?   | 1 | 0 | 0 | 0 | 0 | 0&1 | 1 | 0   | 0 | 0 | 0 | 0 | 4 |
| <i>Miconia tschudyooides</i>    | 0   | 0 | 1   | 0   | ? | 0 | 1 | 0 | 0 | ?   | 0 | ?   | 0 | 1 | 0 | 1 | 1 |
| <i>Miconia tuberculata</i> †    | 0   | 0 | 0   | 0   | 1 | 0 | 0 | 1 | 0 | 1   | 1 | 0   | 0 | 0 | 0 | 0 | 0 |
| <i>Miconia valtheri</i>         | 0   | 0 | 1   | 0&3 | 1 | 0 | 0 | 0 | 0 | 1   | 1 | 0   | 0 | 0 | 0 | 0 | 2 |
| <i>Miconia villonacensis</i>    | 0   | 0 | 1   | 0   | 1 | 0 | 0 | ? | ? | ?   | ? | ?   | ? | ? | ? | ? | 1 |
| <i>Miconia viscidula</i>        | 0&1 | 0 | 0   | 7   | 1 | 0 | 1 | 1 | 0 | 1   | 1 | 0&1 | 0 | 0 | 0 | 0 | 2 |
| <i>Miconia willdenowii</i>      | 0   | 0 | 0   | 0   | 1 | 0 | 0 | 1 | 0 | 0   | 1 | 1   | 2 | 0 | 1 | 0 | 7 |
| <i>Necramium gigantophyllum</i> | 0   | 0 | 0   | 0   | 2 | 0 | 0 | 1 | 1 | 0   | 1 | 0   | 1 | 1 | 0 | 0 | 1 |
| <i>Ossaea amygdaloides</i>      | 0&1 | 0 | 0   | 5   | 2 | 0 | 1 | 1 | 0 | 0   | 1 | 0   | 0 | 0 | 0 | 0 | 2 |
| <i>Ossaea brenesii</i>          | 0   | 0 | 0   | 0   | 2 | 1 | 0 | 1 | 0 | 1   | 1 | 0   | 0 | 0 | 1 | 0 | 0 |
| <i>Ossaea capillaris</i>        | 0   | 0 | 0   | 3&6 | 1 | 0 | 0 | 0 | 1 | 1   | 1 | 0   | 0 | 0 | 1 | 0 | 0 |
| <i>Ossaea coarctiflora</i>      | 0   | 0 | 0   | ?   | 0 | 0 | 0 | 0 | 1 | 1   | 1 | 0   | 1 | 0 | 1 | 0 | 0 |
| <i>Ossaea confertiflora</i>     | 0   | 0 | 0&1 | ?   | 2 | 0 | 0 | 1 | 0 | 1   | 1 | 0   | 0 | 1 | 0 | 0 | 2 |
| <i>Ossaea congestiflora</i>     | 0   | 0 | 1   | 5   | 2 | 0 | 0 | 1 | 0 | 1   | 1 | 0   | 0 | 0 | 0 | 0 | 2 |
| <i>Ossaea macrophylla</i>       | 1   | 0 | 0   | 5   | 1 | 0 | 0 | 0 | 0 | 1   | 1 | 0   | 0 | 0 | 1 | 0 | 0 |
| <i>Ossaea micrantha</i>         | 0   | 0 | 0   | 0   | 2 | 1 | 0 | 1 | 0 | 1   | 1 | 0   | 0 | 0 | 1 | 0 | 0 |
| <i>Ossaea petiolaris</i>        | 0   | 0 | 1   | 2   | 0 | 0 | 0 | 0 | 1 | 1   | 1 | 0   | 1 | 0 | 1 | 0 | 0 |
| <i>Ossaea quadrisulca</i>       | 0   | 0 | 0&1 | 2   | 0 | 0 | 0 | 0 | 1 | 0   | 1 | 0   | 1 | 0 | 1 | 0 | 0 |
| <i>Ossaea robusta</i>           | 0   | 0 | 0   | 5   | 1 | 0 | 0 | 1 | 0 | 1   | 1 | 0   | 0 | 0 | 1 | 0 | 0 |
| <i>Ossaea sanguinea</i>         | 0   | 0 | 0   | ?   | 2 | 0 | 0 | 1 | 0 | 1   | 1 | 0   | 0 | 1 | 0 | 1 | 1 |
| <i>Ossaea sparrei</i>           | 1   | 0 | 0&1 | ?   | 2 | 0 | 0 | 1 | 0 | 1   | 1 | 0   | 0 | 0 | 1 | 0 | 1 |
| <i>Ossaea spicata</i>           | 1   | 0 | 0   | 5   | 2 | 0 | 0 | 0 | 0 | 1   | 1 | 0   | 0 | 0 | 1 | 0 | 0 |

|                                   |     |   |     |     |   |   |   |   |   |     |   |     |   |   |   |   |   |
|-----------------------------------|-----|---|-----|-----|---|---|---|---|---|-----|---|-----|---|---|---|---|---|
| <i>Ossaea turquinensis</i>        | 0   | 0 | 0&1 | 5   | 2 | 0 | 1 | 0 | 0 | 1   | 1 | 0   | 0 | 0 | 1 | 0 | 1 |
| <i>Pachyanthus angustifolius</i>  | 0   | 0 | 0&1 | 3   | 1 | 0 | 1 | 0 | 0 | 1   | 1 | 0   | 0 | 0 | ? | 0 | 1 |
| <i>Pachyanthus clementis</i>      | 0   | 0 | 0   | 5   | 2 | 0 | 0 | 0 | 0 | 1   | 1 | 0   | 0 | 0 | 0 | 0 | 1 |
| <i>Pachyanthus cubensis</i>       | 0   | 0 | 1   | 0&5 | 1 | 0 | ? | 0 | 0 | 0&1 | ? | 1   | 2 | 0 | 0 | 0 | 3 |
| <i>Pachyanthus mantuensis</i>     | 0   | 0 | 0   | 5   | 2 | 0 | 0 | 0 | 0 | 1   | 1 | 0   | 0 | 0 | 0 | 0 | 1 |
| <i>Pachyanthus mayarensis</i>     | 0   | 0 | 1   | ?   | 2 | 0 | 1 | 1 | 1 | 0   | 1 | 0   | 1 | 0 | 0 | 0 | 2 |
| <i>Pachyanthus moensis</i>        | 0   | 0 | 1   | 0   | 2 | 0 | 0 | 1 | 0 | 1   | 1 | 0   | 0 | 0 | 0 | 0 | 3 |
| <i>Pachyanthus pedicellatus</i>   | 0   | 0 | 0&1 | 5   | 2 | 0 | 0 | 0 | 0 | 1   | 1 | 0   | 0 | 0 | 1 | 0 | 1 |
| <i>Pachyanthus poiretii</i>       | 0   | 0 | 0   | 0   | 2 | 0 | 0 | 0 | 1 | 1   | 1 | 0   | 0 | 0 | 0 | 0 | 1 |
| <i>Pachyanthus reticulatus</i>    | 0   | 0 | 0   | 5   | 2 | 0 | 0 | 0 | 1 | ?   | 0 | ?   | 1 | 0 | 0 | 0 | 3 |
| <i>Pachyanthus tetramerus</i>     | 0   | 0 | 0   | ?   | ? | 0 | 0 | 1 | 1 | 1   | 1 | 0   | 0 | 0 | 0 | 0 | 1 |
| <i>Pachyanthus wrightii</i>       | 0   | 0 | 0   | 0   | 2 | 0 | 0 | 0 | 0 | 1   | 1 | 0   | 0 | 0 | 0 | 0 | 1 |
| <i>Physeterostemon fiaschii</i> § | 1   | 0 | 1   | ?   | 2 | 0 | 1 | 1 | 0 | 1   | 1 | 0&1 | 0 | 1 | 0 | 0 | 0 |
| <i>Pleiochiton ebracteatum</i>    | 0   | 0 | 1   | 0   | 1 | 0 | 0 | 0 | 1 | 0&1 | 1 | 0   | 1 | 0 | 0 | 1 | 2 |
| <i>Pleiochiton roseum</i>         | 0   | 0 | 1   | ?   | ? | 0 | 0 | 0 | 1 | 0&1 | 1 | 0   | 1 | 0 | 0 | 0 | 1 |
| <i>Pleiochiton setulosum</i>      | 0   | 0 | 1   | ?   | 1 | 0 | 0 | 0 | 1 | 0   | 1 | 0&1 | 1 | 0 | 0 | 0 | 1 |
| <i>Sagraea fuertesii</i>          | 0   | 0 | 0   | 0   | 1 | 0 | 0 | 1 | 1 | 0   | 1 | 0   | 0 | 0 | 0 | 0 | 1 |
| <i>Sagraea scalpta</i>            | 0   | 0 | 0   | 3&5 | 1 | 0 | 1 | 1 | 1 | 0   | 1 | 0   | 1 | 0 | 0 | 1 | 1 |
| <i>Tetrazygia barbata</i>         | 0   | 0 | 0&1 | ?   | 2 | 0 | 1 | 0 | 0 | 1   | 1 | 0&1 | 0 | 0 | 0 | 0 | 3 |
| <i>Tetrazygia bicolor</i>         | 0   | 0 | 0   | 7   | 2 | 0 | 0 | 1 | 1 | 1   | 1 | 0   | 0 | 0 | 0 | 0 | 4 |
| <i>Tetrazygia coriacea</i>        | 0&1 | 0 | 0&1 | ?   | 2 | 0 | 1 | 0 | 1 | 1   | 1 | 0   | 0 | 0 | 0 | 0 | 2 |
| <i>Tetrazygia crotonifolia</i>    | 0   | 0 | 0   | ?   | 1 | 0 | 0 | 1 | 0 | 1   | 1 | 0   | 0 | 0 | 1 | 0 | 1 |
| <i>Tetrazygia discolor</i>        | 0&1 | 0 | 0   | 0&5 | 2 | 0 | 1 | 1 | ? | 1   | 1 | 0   | 0 | 0 | 0 | 1 | 1 |
| <i>Tetrazygia eleagnoides</i>     | 1   | 0 | 0   | 5   | 1 | 0 | 0 | 0 | 0 | 1   | 1 | 0   | 0 | 0 | 0 | 0 | 2 |
| <i>Tetrazygia fadyenii</i>        | 0&1 | 0 | 0   | ?   | 2 | 0 | 1 | 1 | ? | ?   | ? | ?   | ? | ? | ? | ? | 2 |
| <i>Tetrazygia lanceolata</i>      | 0   | 0 | 0   | 1   | 2 | 0 | 1 | 0 | 1 | 1   | 1 | 0   | 0 | 0 | 0 | 0 | 3 |
| <i>Tetrazygia longicollis</i>     | 0   | 0 | 0   | ?   | ? | 0 | 0 | 1 | 0 | 1   | 1 | 0   | 0 | 0 | 0 | 0 | 2 |
| <i>Tetrazygia urbaniana</i>       | 0   | 0 | 0   | 0&5 | 1 | 0 | 0 | 1 | 0 | 1   | 1 | 0   | 0 | 0 | 1 | 0 | 1 |
| <i>Tococa aristata</i>            | 0   | 0 | 0   | 0   | 2 | 0 | 1 | 1 | 0 | 0&1 | 1 | 0   | 0 | 0 | 0 | 0 | 2 |
| <i>Tococa caquetana</i>           | 1   | 0 | 0   | 5   | 1 | 0 | 1 | 1 | 0 | 1   | 1 | 0   | 0 | 0 | 1 | 0 | 0 |
| <i>Tococa coronata</i>            | 0   | 0 | 0   | 0   | 2 | 0 | 0 | 1 | ? | ?   | ? | ?   | ? | ? | ? | ? | 6 |
| <i>Tococa guianensis</i>          | 0   | 0 | 0   | 0   | 2 | 0 | 0 | 0 | 1 | 0   | 1 | 0   | 1 | 0 | 0 | 0 | 2 |
| <i>Tococa macrophysca</i>         | 0   | 0 | 0   | 0&3 | 2 | 1 | 0 | 1 | 1 | 1   | 1 | 1   | 0 | 0 | 0 | 0 | 2 |
| <i>Tococa macrosperma</i>         | 0   | 0 | 1   | 0   | 2 | 0 | 0 | 0 | 1 | 0   | 2 | 1   | 2 | 0 | 0 | 0 | 4 |
| <i>Tococa nitens</i>              | 0   | 0 | 0&1 | 0&3 | 2 | 0 | 0 | 1 | 0 | 0   | 1 | 0&1 | 0 | 0 | 0 | 0 | 2 |
| <i>Tococa perclara</i>            | 0   | 0 | 1   | 0&3 | 1 | 0 | 0 | 1 | 0 | 1   | 1 | 0   | 0 | 0 | 1 | 0 | 1 |
| <i>Tococa platyphylla</i>         | 0   | 0 | 0&1 | 0   | 2 | 0 | 0 | 1 | 0 | 1   | 1 | 0   | 0 | 0 | 1 | 0 | 1 |
| <i>Tococa quadrialata</i>         | 0   | 0 | 0   | 0   | 1 | 0 | 0 | 1 | 1 | 0   | 1 | 0&1 | 1 | 0 | 0 | 0 | 1 |
| <i>Tococa rotundifolia</i>        | 0   | 0 | 0   | 0&3 | 2 | 0 | 0 | 1 | 0 | 0   | 1 | 0   | 2 | 0 | 1 | 0 | 4 |
| <i>Tococa spadiciflora</i>        | 0   | 0 | 0   | 6   | 1 | 0 | 0 | 0 | 1 | 1   | 1 | 0   | 0 | 0 | 1 | 0 | 0 |
| <i>Tococa subciliata</i>          | 0   | 0 | 0   | 0&5 | 2 | 0 | 0 | 0 | 1 | 1   | 1 | 1   | 1 | 0 | 1 | 0 | 5 |
